1 **Accuracy of digital chest x-ray analysis with artificial intelligence software as a triage and screening**  
2 **tool in hospitalized patients being evaluated for tuberculosis in Lima, Peru.**

3  
4 Amanda Biewer<sup>1\*</sup>, Christine Tzelios<sup>2\*</sup>, Karen Tintaya<sup>3</sup>, Betsabe Roman<sup>3</sup>, Shelley Hurwitz<sup>2</sup>, Courtney  
5 Yuen<sup>4</sup>, Carole D. Mitnick<sup>4</sup>, Edward Nardell<sup>4</sup>, Leonid Lecca<sup>3</sup>, Dylan B. Tierney<sup>4,5</sup>, Ruvandhi R.  
6 Nathavitharana<sup>1</sup>

7  
8 <sup>1</sup> Beth Israel Deaconess Medical Center and Harvard Medical School, Boston, MA

9 <sup>2</sup> Harvard Medical School, Boston, MA

10 <sup>3</sup> Socios en Salud, Lima, Peru

11 <sup>4</sup> Brigham and Women's Hospital and Harvard Medical School, Boston, MA

12 <sup>5</sup> Massachusetts Department of Public Health, Boston, MA

13 \* contributed equally

14  
15 **Abstract**

16 Introduction:

17 Tuberculosis (TB) transmission in healthcare facilities is common in high-incidence countries. Yet, the  
18 optimal approach for identifying inpatients who may have TB is unclear. We evaluated the diagnostic  
19 accuracy of qXR (Qure.ai, India) computer-aided detection (CAD) software versions 3 and 4 (v3 and  
20 v4) as a triage and screening tool within the FAST (Find cases Actively, Separate safely, and Treat  
21 effectively) transmission control strategy.

22  
23 Methods:

24 We prospectively enrolled two cohorts of patients admitted to a tertiary hospital in Lima, Peru: one  
25 group had cough or TB risk factors (triage) and the other did not report cough or TB risk factors  
26 (screening). We evaluated the sensitivity and specificity of qXR for the diagnosis of pulmonary TB  
27 using culture and Xpert as primary and secondary reference standards, including stratified analyses  
28 based on risk factors.

29

30 Results:

31 In the triage cohort (n=387), qXRv4 sensitivity was 0.95 (62/65, 95% CI 0.87-0.99) and specificity was  
32 0.36 (116/322, 95% CI 0.31-0.42) using culture as reference standard. There was no difference in the  
33 area under the receiver-operating-characteristic curve (AUC) between qXRv3 and qXRv4 with either a  
34 culture or Xpert reference standard. In the screening cohort (n=191), only one patient had a positive  
35 Xpert result, but specificity in this cohort was high (>90%). qXR sensitivity did not differ stratified by  
36 sex, age, prior TB, HIV, and symptoms. Specificity was higher in people without prior TB and people  
37 with a cough for <2 weeks.

38

39 Conclusions:

40 qXR had high sensitivity but low specificity as a triage in hospitalized patients with cough or TB risk  
41 factors. Screening patients without cough in this setting had a low diagnostic yield. These findings  
42 further support the need for population and setting-specific thresholds for CAD programs.

43

44

45

46

47

48

49

50

51

## 52 **Introduction**

53 Diagnosis remains the largest gap in the tuberculosis (TB) cascade of care. In 2021, of the 10.6 million  
54 people estimated to become sick due to TB, only 6.4 million were diagnosed and notified to national  
55 notification systems<sup>1</sup>. Efforts to increase and accelerate diagnoses are critical to prevent severe  
56 disease, avert TB deaths, and halt ongoing transmission<sup>2</sup>. Healthcare facilities are known hotspots for  
57 TB transmission in high-incidence settings<sup>3-7</sup>. Globally, the rate of TB disease among healthcare  
58 workers is estimated to be at least double that of the general adult population, suggesting significant  
59 transmission in health facilities<sup>8,9</sup>. The FAST (Find cases Actively, Separate safely, and Treat  
60 effectively) strategy was developed to reduce TB transmission in healthcare settings, based on the  
61 principle that most transmission occurs from patients with unsuspected and thus undiagnosed TB,  
62 including drug-resistant strains<sup>10</sup>. FAST relies on identifying potentially infectious patients, typically  
63 with cough screening, followed by rapid sputum-based molecular tests that include first line  
64 resistance testing to enable prompt initiation of effective treatment<sup>7,10</sup>. (1, 2) FAST has been  
65 implemented in a variety of settings, including Peru, Bangladesh, Russia, and Vietnam<sup>11-14</sup>. Given the  
66 slow scale up of rapid molecular tests<sup>1</sup>, due to barriers such as cost, optimizing screening approaches  
67 for the FAST strategy is critical for its implementation success.

68

69 Triage is the process of making clinical decisions based on symptoms, signs, risk factors, or test  
70 results<sup>15</sup>. Rapid and accurate triage tests play an important role in identifying patients requiring  
71 further diagnostic evaluation among those with symptoms or risk factors for disease<sup>16</sup>. Screening  
72 similarly involves non-diagnostic testing to distinguish between people who likely have the disease  
73 from those who are unlikely to have the disease, typically in a population who do not have  
74 symptoms<sup>15</sup>. There is a long history of using chest radiography (CXR) to screen for pulmonary TB, but

75 its utility in high TB incidence settings has been limited by the scarcity of skilled radiologists to  
76 interpret images.<sup>17</sup> The advent of digital radiography coupled with computer aided detection (CAD)  
77 software eliminates this potential barrier, making it more feasible to implement CXR for triage or  
78 screening in resource limited settings. CAD uses artificial intelligence algorithms to analyze  
79 radiographs for abnormalities consistent with TB. CAD is now recommended by the World Health  
80 Organization (WHO) as an alternative to human readers<sup>17</sup>. Nonetheless, while CAD sensitivity for both  
81 triage and screening is typically >90%, CAD specificity varies widely, from 23%–66% for screening<sup>18–20</sup>  
82 and 25%–79% for triage<sup>18,21,22</sup> when compared to a microbiological reference standard.

83

84 Questions remain regarding the optimal approach for using CAD to identify potentially infectious  
85 people with TB, particularly in hospital settings. A retrospective case-control study evaluating CAD in  
86 patients presenting with respiratory symptoms to a tertiary care hospital in India demonstrated  
87 moderate sensitivity and specificity (71% and 80% respectively) for the detection of pulmonary TB<sup>23</sup>.  
88 However, TB prevalence surveys reveal a high proportion of people diagnosed with pulmonary TB  
89 who do not report symptoms,<sup>25</sup> highlighting poor implementation and yield of symptom screening<sup>24</sup>.  
90 Moreover, many CAD studies have focused on triage of outpatients presenting with symptoms<sup>26–29</sup>;  
91 although there are some examples of CAD screening programs that are not contingent on symptom  
92 screening, these have been community-based<sup>30–33</sup>.

93

94 The aim of this study was to evaluate the diagnostic accuracy of digital CXR with CAD software as a  
95 tool for: 1) triage—among patients with cough or TB risk factors—and; 2) screening—among patients  
96 without cough or TB risk factors—to identify admitted patients who should undergo molecular TB  
97 testing in a tertiary care hospital in Lima, Peru.

## 98 **Methods**

### 99 Study design and participants

100 We conducted a cross-sectional diagnostic accuracy study that was embedded in a larger prospective  
101 study evaluating FAST implementation at Hospital Nacional Hipolito Unanue (HNHU), a 700-bed  
102 public, tertiary-care referral hospital in Lima, Peru (<https://clinicaltrials.gov/ct2/show/NCT02355223>).  
103 Patients admitted to HNHU from January 2nd 2018 to December 31st 2019 were consecutively  
104 screened by the FAST implementation team study staff using a standardized questionnaire upon  
105 facility admission, as previously described<sup>11</sup>. Two cohorts were enrolled for this diagnostic accuracy  
106 sub-study. Eligible individuals were adults ( $\geq 18$  years old) who, (upon questioning by the study  
107 team), reported either: 1) cough of any duration and/or the following risk factors for TB: contact with  
108 someone diagnosed with pulmonary TB, a current active TB diagnosis, or a history of prior active TB  
109 (triage cohort); or 2) no cough or TB risk factors (screening cohort).

110

### 111 Ethics statement

112 The study was approved by the Institutional Review Boards of HNHU and Brigham and Women's  
113 Hospital. Written informed consent was obtained from all patients. Participants were assigned a  
114 unique study ID number, recorded on data collection forms and clinical specimens to facilitate data  
115 linkage; names and other obvious identifiers were not used on data collection forms, thus authors did  
116 not have access to information that could identify individual participants during or after data  
117 collection.

118

### 119 Study procedures, data collection, and outcome classification

120 On the day of admission, patients in both cohorts who were admitted through the emergency room  
121 underwent posterior-anterior digital CXR and study staff collected at least 2 sputum samples for TB  
122 testing using smear microscopy, mycobacterial culture, Xpert MTB/RIF (Xpert, Cepheid, Sunnyvale,  
123 CA), and/or GenoType MTBDRplus line probe assay. De-identified CXR images were electronically  
124 transferred for automated analysis (blinded to other demographic and clinical data including the  
125 results of other TB testing) by the developers of qXR (qure.ai, Mumbai, India) who ran versions 3.0  
126 (v3) and 4.0 (v4) on all images. CXR was obtained prospectively but qXR results were not used to  
127 guide clinical management. Information on socio-demographic and clinical variables including current  
128 and prior TB history, co-morbidities, and microbiological test results, was collected at the time of  
129 enrollment, or retrieved from the medical records using standardized case report forms. Culture and  
130 Xpert results were classified separately as binary variables (positive or negative for *Mycobacterium*  
131 *tuberculosis*). If a patient had more than one culture result and at least one or more were positive,  
132 the binary result was classified as positive; the same applied to Xpert results.

133

#### 134 Analyses

135 For our primary diagnostic accuracy analyses, the diagnosis of pulmonary TB in both the triage and  
136 screening cohorts was established by the presence of a sputum culture that grew *Mycobacterium*  
137 *tuberculosis*. For our secondary diagnostic accuracy analyses, the diagnosis of pulmonary TB in both  
138 the triage and screening cohorts was established by the presence of a positive sputum Xpert result.  
139 Analyses using qXRv4 are presented in the main manuscript and qXRv3 are presented in the  
140 supplementary data. qXR sensitivity and specificity (with exact 95% C.I.s) for pulmonary TB were  
141 calculated using the manufacturer's prespecified thresholds (0.5 for v3 and 0.65 for v4) per STARD  
142 guidelines (see supplementary files)<sup>34</sup>. DeLong's non-parametric method was applied to compare

143 differences between the areas under the receiver operating characteristic curve (AUC) for the two  
144 qXR software versions. We also estimated the specificity at the threshold score at which sensitivity  
145 was closest to 90% (WHO triage test minimum TPP recommended criteria)<sup>35</sup>. Pre-specified sensitivity  
146 analyses were designed to examine qXR accuracy when certain groups known to have increased risk  
147 for TB were excluded: people with HIV, people with prior TB, and people with other respiratory  
148 diseases (asthma or bronchiectasis).

149

150 Using Fisher's exact test, we assessed performance differences in prespecified groups with  
151 characteristics or risk factors that may impact diagnostic test performance: male sex, older age, prior  
152 TB, HIV co-infection, other respiratory disease co-morbidities, presence of TB symptoms in WHO  
153 symptom screen (cough, fever, night sweats, weight loss), and higher-grade sputum smear result.  
154 Analyses were completed using STATA/IC version 16 (StataCorp. 2019. Stata Statistical Software:  
155 Release 16. College Station, TX: StataCorp LLC.).

156

## 157 **Results**

158 During the study period we enrolled 964 patients admitted to HNHU who had cough or TB risk  
159 factors, of whom 489 underwent digital CXR in the triage cohort (Figure 1). Participants who were  
160 taking anti-TB drugs or had taken them within one year of enrollment (n=50; 10%) were excluded as  
161 were those who had no microbiological testing (n=20; 4%). We enrolled 220 individuals without  
162 cough or TB risk factors in the screening cohort. Screening participants who were household contacts  
163 of people who experienced TB were excluded (n=27; 13%) as were those who had no microbiological  
164 testing (n=9; 4%).

165

166 Figure 1: Study Flow Diagram

167

168

169 **Triage cohort**

170 Demographics

171 Of the 419 participants in the triage cohort, 387 (93%) had a mycobacterial culture result; it was

172 positive in 65 (17%) participants, of whom 41 (63%) also had positive sputum-smear microscopy

173 results. In this cohort, 398 (95%) had an Xpert MTB/RIF result; it was positive in 69 (17%), of whom 39

174 (57%) had positive smear microscopy. Culture and Xpert results were largely concordant, although

175 Xpert was positive in some people who did not have culture or who had a negative culture (Table S1).

176 Compared to participants without TB (based on sputum culture results), participants with culture

177 confirmed TB were more likely to be younger, male, have a history of incarceration, report cough

178 longer than 2 weeks, fever, or weight loss, and not have a history of any respiratory diseases or a

179 prior history of TB (Table 1).

180

181 Table 1: Demographic and clinical characteristics of enrolled participants

182

|                                                    | Triage Patients    |                           |                          |                                   | Screening* Patients |                         |                  |
|----------------------------------------------------|--------------------|---------------------------|--------------------------|-----------------------------------|---------------------|-------------------------|------------------|
|                                                    | Overall (n=419)    | TB <sup>^</sup><br>(n=65) | No TB<br>(n=322)         | No Culture<br>Performed<br>(n=32) | P-<br>value**       | Overall<br>(n=184)      | P-<br>value**    |
| <b>Median Age (years,<br/>interquartile range)</b> | 41.35 (26.8, 56.6) | 35.34<br>(24.0,<br>48.6)  | 42.01<br>(27.5,<br>57.0) | 44.68 (31.7,<br>63.3)             | <b>0.003</b>        | 36.19 (25.19,<br>50.53) | <b>0.015</b>     |
| <b>Sex, No (%)</b>                                 |                    |                           |                          |                                   | <b>0.025</b>        |                         |                  |
| Female                                             | 164 (39.1)         | 17 (26.1)                 | 134 (41.6)               | 13 (40.6)                         |                     | 111 (60.3)              | <b>&lt;0.001</b> |
| Male                                               | 255 (60.9)         | 48 (73.9)                 | 188 (58.4)               | 19 (59.4)                         |                     | 73 (39.7)               |                  |
| <b>History of Previous TB,<br/>No (%)</b>          |                    |                           |                          |                                   | <b>0.014</b>        |                         | <b>&lt;0.001</b> |
| Yes                                                | 140 (33.4)         | 13 (20.0)                 | 114 (35.4)               | 13 (40.6)                         |                     | 0 (0.00)                |                  |
| No                                                 | 278 (66.4)         | 52 (80.0)                 | 207 (64.3)               | 19 (59.4)                         |                     | 184 (100)               |                  |
| Refused                                            | 1 (0.20)           | 0 (0.00)                  | 1 (0.3)                  | 0 (0.00)                          |                     |                         |                  |
| <b>HIV, No (%)</b>                                 |                    |                           |                          |                                   | 0.635               |                         | <b>&lt;0.001</b> |
| Yes                                                | 36 (8.6)           | 7 (10.8)                  | 28 (8.7)                 | 1 (3.1)                           |                     | 1 (0.5)                 |                  |
| No                                                 | 383 (91.4)         | 58 (89.2)                 | 294 (91.3)               | 31 (96.9)                         |                     | 183 (99.5)              |                  |



|                                                         |            |           |            |           |                  |            |                  |
|---------------------------------------------------------|------------|-----------|------------|-----------|------------------|------------|------------------|
| <b>Smoking, No (%)</b>                                  |            |           |            |           |                  |            |                  |
| Never                                                   | 202 (48.2) | 28 (43.0) | 162 (50.3) | 12 (37.5) | 0.501            | 99 (53.8)  | 0.637            |
| Former                                                  | 161 (38.4) | 30 (46.2) | 116 (36.0) | 15 (46.9) |                  | 51 (27.7)  |                  |
| Current                                                 | 56 (13.4)  | 7 (10.8)  | 44 (13.7)  | 5 (15.6)  |                  | 34 (18.5)  |                  |
| <b>Alcohol, No (%)</b>                                  |            |           |            |           |                  |            |                  |
| Never                                                   | 107 (25.5) | 9 (13.9)  | 90 (28.0)  | 8 (25.0)  | 0.092            | 32 (17.3)  | <b>&lt;0.001</b> |
| Former                                                  | 121 (28.9) | 22 (33.9) | 90 (28.0)  | 9 (28.1)  |                  | 33 (18.0)  |                  |
| Current                                                 | 189 (45.1) | 32 (49.2) | 142 (44.0) | 15 (46.9) |                  | 119 (64.7) |                  |
| Missing                                                 | 2 (0.5)    | 2 (3.0)   | 0 (0.00)   | 0 (0.00)  |                  | 0 (0.00)   |                  |
| <b>Respiratory Disease, No (%)</b>                      |            |           |            |           |                  |            |                  |
| Asthma                                                  | 28 (6.7)   | 1 (1.5)   | 26 (8.1)   | 2 (6.3)   | <b>0.047</b>     | 2 (1.1)    | <b>0.001</b>     |
| Bronchiectasis                                          | 13 (3.1)   | 0 (0.00)  | 11 (3.4)   | 1 (3.1)   |                  | 182 (98.9) |                  |
| None                                                    | 378 (90.2) | 64 (98.5) | 285 (88.5) | 29 (90.6) |                  | 0 (0.00)   |                  |
| <b>Diabetes, Type II, No (%)</b>                        |            |           |            |           |                  |            |                  |
| Yes                                                     | 58 (13.8)  | 9 (13.9)  | 42 (13.0)  | 7 (21.9)  | 0.842            | 25 (13.6)  | 1.000            |
| No                                                      | 361 (86.2) | 56 (86.1) | 280 (87.0) | 25 (78.1) |                  | 159 (86.4) |                  |
| <b>Prison, No (%)</b>                                   |            |           |            |           |                  |            |                  |
| Yes                                                     | 62 (14.8)  | 16 (24.6) | 41 (12.7)  | 5 (15.6)  | <b>0.020</b>     | 3 (1.6)    | <b>&lt;0.001</b> |
| No                                                      | 357 (85.2) | 49 (75.4) | 281 (87.3) | 27 (84.4) |                  | 181 (98.4) |                  |
| <b>Household Contact of TB positive patient, No (%)</b> |            |           |            |           |                  |            |                  |
| Yes                                                     | 159 (38.0) | 27 (41.5) | 119 (37.0) | 13 (40.6) | 0.754            | -          | -                |
| No                                                      | 256 (61.1) | 38 (58.5) | 199 (61.8) | 19 (59.4) |                  |            |                  |
| Missing                                                 | 4 (0.9)    | 0 (0.00)  | 4 (1.2)    | 0 (0.00)  |                  |            |                  |
| <b>Smear Status, No (%)</b>                             |            |           |            |           |                  |            |                  |
| Positive                                                | 48 (11.5)  | 41 (63.1) | 4 (1.2)    | 3 (9.4)   | <b>&lt;0.001</b> | 0 (0.00)   | <b>&lt;0.001</b> |
| Negative                                                | 363 (86.6) | 16 (24.6) | 318 (98.8) | 29 (90.6) |                  | 183 (99.5) |                  |
| Missing                                                 | 8 (1.9)    | 8 (12.3)  | 0 (0.00)   | 0 (0.00)  |                  | 1 (0.5)    |                  |
| <b>TB-associated Symptoms</b>                           |            |           |            |           |                  |            |                  |
| <b>Cough, No (%)</b>                                    |            |           |            |           |                  |            |                  |
| <i>Length, in Weeks</i>                                 |            |           |            |           |                  |            |                  |
| Less than 1 week                                        | 102 (24.4) | 8 (12.3)  | 90 (28.0)  | 4 (12.5)  | <b>0.003</b>     | -          | -                |
| 1-2 weeks                                               | 107 (25.5) | 16 (24.6) | 81 (25.1)  | 10 (31.2) |                  |            |                  |
| More than 2 weeks                                       | 189 (45.1) | 39 (60.0) | 132 (41.0) | 18 (56.3) |                  |            |                  |
| Missing                                                 | 21 (5.0)   | 2 (3.1)   | 19 (5.9)   | 0 (0.00)  |                  |            |                  |
| <i>Phlegm</i>                                           |            |           |            |           |                  |            |                  |
| Yes                                                     | 352 (84.0) | 60 (92.3) | 262 (81.4) | 30 (93.8) | 0.056            | -          | -                |
| No                                                      | 47 (11.2)  | 3 (4.6)   | 42 (13.0)  | 2 (6.2)   |                  |            |                  |
| Missing                                                 | 20 (4.8)   | 2 (3.1)   | 18 (5.6)   | 0 (0.00)  |                  |            |                  |
| <i>Blood</i>                                            |            |           |            |           |                  |            |                  |
| Yes                                                     | 166 (39.6) | 33 (50.8) | 120 (37.3) | 13 (40.6) | 0.068            | -          | -                |
| No                                                      | 233 (55.6) | 30 (46.2) | 184 (57.1) | 19 (59.4) |                  |            |                  |
| Missing                                                 | 20 (4.8)   | 2 (3.0)   | 18 (5.6)   | 0 (0.00)  |                  |            |                  |
| <b>Fever, No (%)</b>                                    |            |           |            |           |                  |            |                  |
| Yes                                                     | 265 (63.3) | 52 (80.0) | 192 (59.6) | 21 (65.6) | <b>0.001</b>     | 85 (46.2)  | <b>&lt;0.001</b> |
| No                                                      | 153 (36.5) | 12 (18.5) | 130 (40.4) | 11 (34.4) |                  | 99 (53.8)  |                  |
| Refused                                                 | 1 (0.2)    | 1 (1.5)   | 0 (0.00)   | 0 (0.00)  |                  | 0 (0)      |                  |
| <b>Night Sweats in the last</b>                         |            |           |            |           |                  |            |                  |

|                                            |            |           |            |           |              |            |                  |
|--------------------------------------------|------------|-----------|------------|-----------|--------------|------------|------------------|
| <b>3 months, No (%)</b>                    |            |           |            |           |              |            |                  |
| Yes                                        | 251 (59.9) | 45 (69.2) | 182 (56.5) | 24 (75.0) | 0.072        | 52 (28.3)  | <b>&lt;0.001</b> |
| No                                         | 168 (40.1) | 20 (30.8) | 140 (43.5) | 8 (25.0)  |              | 132 (71.7) |                  |
| <b>Weight Loss (unintentional), No (%)</b> |            |           |            |           |              |            |                  |
| Yes                                        | 293 (69.9) | 55 (84.6) | 218 (67.7) | 20 (62.5) | <b>0.004</b> | 84 (45.6)  | <b>&lt;0.001</b> |
| No                                         | 123 (29.4) | 9 (13.9)  | 102 (31.7) | 12 (37.5) |              | 98 (53.3)  |                  |
| Refused                                    | 3 (0.7)    | 1 (1.5)   | 2 (0.6)    | 0 (0.00)  |              | 2 (1.1)    |                  |
| <b>Difficulty Breathing, No (%)</b>        |            |           |            |           |              |            |                  |
| Yes                                        | 335 (80.0) | 51 (78.5) | 260 (80.8) | 24 (75.0) | 0.732        | 52 (28.3)  | <b>&lt;0.001</b> |
| No                                         | 84 (20.0)  | 14 (21.5) | 62 (19.2)  | 8 (25.0)  |              | 132 (71.7) |                  |

183

184 ^ TB was diagnosed based on positive sputum culture i.e. pulmonary TB, we did not include clinical  
185 diagnoses or include evaluation for extra-pulmonary TB

186

187 \*Screening cohort consists of patients who did not report cough or TB risk factors

188

189 \*\*For continuous variables, an independent t-test was conducted. For binary variables, a Fisher's  
190 exact test was performed. For unordered categorical variables, Chi-square test was performed, and  
191 Jonckheere-Terpstra test was used for ordered categories. The first p value represents a comparison  
192 between participants with and without pulmonary TB in the triage cohort and the second p value  
193 represents the comparison between the overall triage and screening cohort participant groups. The  
194 missing and refused categories are excluded from statistical comparisons.

195

## 196 Diagnostic accuracy

197 Using culture as the reference standard for pulmonary TB, qXR v4 (at the manufacturer pre-specified

198 threshold of 0.65) had an overall sensitivity for pulmonary TB of 0.95 (62/65, 95% CI 0.87-0.99),

199 specificity of 0.36 (116/322, 95% CI 0.31-0.42), and AUC of 0.66 (95% CI 0.62-0.69) (Table 2). Using

200 Xpert as the reference standard for pulmonary TB, qXR v4 (at the manufacturer pre-specified

201 threshold of 0.65) had an overall sensitivity of 0.93 (64/69, 95% CI 0.84-0.98), specificity of 0.36

202 (118/329, 95% CI 0.31-0.41), and AUC of 0.64 (95% CI 0.60-0.68) (Table 2). When the threshold was

203 set such that sensitivity was 90% to match the WHO triage test accuracy performance criterion,

204 specificity was 0.42 (135/322, 95% CI 0.37-0.48) and 0.42 (137/329, 95% CI 0.36-0.47) using the

205 culture and Xpert reference standards respectively (Table 2).

206 Table 2: Summary of Diagnostic Accuracy for qXR version 4 using the culture (primary) and Xpert  
 207 (secondary) reference standards in the triage and screening cohorts.  
 208  
 209

|                                   | Triage Cohort<br>(n=439)       |                                  |                            | Screening Cohort<br>(n= 191) |                                    |                    |
|-----------------------------------|--------------------------------|----------------------------------|----------------------------|------------------------------|------------------------------------|--------------------|
|                                   | Sensitivity<br>(95% CI)        | Specificity<br>(95% CI)          | AUC<br>(95% CI)            | Sensitivity<br>(95% CI)      | Specificity<br>(95% CI)            | AUC<br>(95% CI)    |
| <b>Culture</b>                    |                                |                                  |                            |                              |                                    |                    |
| Manufacturer<br>Threshold<br>0.65 | 95.4%<br>62/65<br>(87.1-99%)   | 36.0%<br>116/322<br>(30.8-41.5%) | 0.657<br>(0.620,<br>0.694) | ^                            | 92.4%<br>159/172<br>(87.4 -95.6%)  | -                  |
| Threshold<br>0.788*               | 90.8%<br>59/65<br>(81-96.5%)   | 41.9%<br>135/322<br>(36.5-47.5%) | 0.663<br>(0.619,<br>0.708) | ^                            | 95.3%<br>(164/172)<br>(90.9-97.7%) | -                  |
| <b>Xpert</b>                      |                                |                                  |                            |                              |                                    |                    |
| Manufacturer<br>Threshold<br>0.65 | 92.8%<br>64/69<br>(83.9-97.6%) | 35.9%<br>118/329<br>(30.7-41.3%) | 0.643<br>(0.603,<br>0.683) | 100%<br>1/1<br>(2.5-100%)    | 93.3%<br>167/179<br>(88.6-96.5%)   | 0.966<br>(-, 1.00) |
| Threshold<br>0.79*                | 89.9%<br>62/69<br>(80.2-95.8%) | 41.6%<br>137/329<br>(36.3-47.2%) | 0.657<br>(0.613,<br>0.702) | 100%<br>1/1<br>(2.5-100%)    | 96.1%<br>172/179<br>(92.1-98.4%)   | 0.980<br>(-, 1.00) |

210  
 211 \*threshold at which sensitivity is closest to 90%  
 212 ^No positive cultures in the Screening Group  
 213  
 214

215 There was no difference between the AUCs for qXR v4 and qXR v3 using either the culture reference  
 216 standard (0.763 [95% CI 0.70-0.82] versus 0.780 [95% CI 0.72-0.84; p=0.438]) or the Xpert reference  
 217 standard (0.748 [95% CI 0.69-0.81] versus 0.759 [95% CI 0.70-0.82]; p=0.611) (Figure 2).

218  
 219 Figure 2: Receiver operating characteristic (ROC) curves and estimates of area under the ROC curves  
 220 (AUC) for qXR versions 3 and 4 to identify abnormalities consistent with TB in the triage cohort using  
 221 the culture (left) and Xpert (right) reference standards.  
 222

223

224

## 225 Stratified analyses

226 There was no difference in qXR sensitivity (v4) when stratified by sex, age, prior TB, HIV, and  
227 symptoms (Figure 3). qXR specificity (v4) was higher in people without prior TB than in people with  
228 prior TB and with cough less than 2 weeks compared to cough for more than 2 weeks (Figure 4).

229  
230 Figure 3: Sensitivity of qXR version 4 for culture-confirmed pulmonary tuberculosis, overall and in pre-  
231 specified stratified groups. p values are from Fisher's exact tests.

232

233

234 Figure 4: Specificity of qXR version 4 for culture-confirmed pulmonary tuberculosis, overall and in pre-  
235 specified stratified groups. p values are from Fisher's exact tests.

236

## 237 Sensitivity analyses

238 We examined qXR accuracy when pre-specified groups in whom TB diagnostic tests are often less  
239 sensitive (PWH, people with prior TB and people with other respiratory diseases) were excluded.

240 Sensitivity for qXR v4 was slightly higher in people without HIV (0.98 [95% CI: 0.91-1.00]), people

241 without prior TB (0.94 [95% CI: 0.84-0.99]), and people without other respiratory diseases (0.95 [95%

242 CI: 0.87-0.99]). Specificity remained low in these groups (people without HIV: 0.34 [95% CI: 0.29-

243 0.40], people without prior TB: 0.43 [95% CI: 0.36-0.50], and people without other respiratory

244 diseases: 0.37 [95% CI: 0.31-0.43]) (Table S2).

245

## 246 High prevalence of lung abnormalities

247 A high prevalence of radiographic lung abnormalities, most notably opacities (82%), consolidation

248 (63%), fibrosis (47%), nodules (57%), or cavitation (19%), was detected by qXR on digital CXR images

249 from the triage cohort (Table S4).

250

251 **Screening cohort**

252 Compared to participants in the triage cohort, participants in the screening cohort were more likely  
253 to be younger and female, not have a history of HIV, any respiratory diseases or a prior history of TB,  
254 not have a history of incarceration, more likely to be non-smokers but more likely to report current  
255 alcohol use, and less likely to report fever, night sweats, or weight loss (Table 1). No participants in  
256 the screening cohort had a positive culture, and only one participant had a positive Xpert. Since there  
257 was only one person with confirmed TB in the screening group (who did have a qXR positive result),  
258 we only report specificity. Using the manufacturer's pre-specified thresholds, the specificity for qXR  
259 v4 was 0.92 (95% CI 0.87-0.96) using the culture reference standard and 0.95 (95% CI 0.91-0.98) using  
260 the Xpert reference standard (Table 2).

261

262

263 **Discussion**

264

265 In our study population of hospitalized patients at a tertiary referral hospital in Lima, Peru, the use of  
266 qXR artificial intelligence software analysis versions 3 and 4 in a triage cohort of patients with cough  
267 or TB risk factors demonstrated a high sensitivity (>90%) but low specificity (32-36%), thereby  
268 meeting only the WHO triage test criteria for sensitivity. In our screening cohort of patients without  
269 cough or risk factors, specificity was high (>90%) but sensitivity could not be evaluated since the  
270 diagnostic yield of screening this group in this setting was low (only one patient was diagnosed with  
271 Xpert-positive TB).

272

273 We previously reported that the FAST strategy using Xpert for molecular diagnosis increased the yield  
274 of TB diagnosis and decreased time to treatment initiation<sup>12</sup>. Yet, despite WHO guidance that  
275 molecular WHO-recommended rapid TB diagnostic tests (mWRD) such as Xpert should be the initial  
276 test for people being evaluated for TB, implementation in Peru and other high-incidence settings has  
277 lagged<sup>1</sup>. While barriers to mWRD implementation are multifactorial<sup>36</sup>, cost and limited laboratory  
278 capacity were challenges to the implementation of Xpert as a triage or screening test as part of  
279 routine practice in our setting. The use of a triage tool such as digital CXR with CAD can help identify  
280 which patients should undergo testing with a mWRD<sup>16</sup> as part of transmission prevention strategies  
281 such as FAST. In our hospitalized study population, qXR was highly sensitive for correctly triaging  
282 people identified as having cough or TB risk factors who had culture confirmed disease. Although low  
283 qXR specificity would lead to a large number of patients with false positive results who required  
284 confirmatory testing and widespread use of digital CXR with CAD poses implementation challenges,  
285 qXR as a triage tool could be of clinical and public health value due to its impact on diagnostic yield  
286 and may still save enough mWRDs to be cost-effective depending on the setting (cost-effectiveness  
287 analyses from our study are forthcoming). Our study adds further weight to the need for population-  
288 specific thresholds<sup>37</sup> to optimize implementation of CAD tools in different settings.

289

290 The low specificity of qXR in inpatients with TB symptoms or risk factors contrasts with cross-  
291 sectional studies that found that qXR met WHO triage test criteria for both sensitivity (>90%) and  
292 specificity (70%) when evaluated in symptomatic outpatients in Bangladesh and Pakistan<sup>26,38</sup>. Our  
293 triage cohort had a high prevalence of radiographic lung abnormalities, which was likely to be an  
294 important contributing factor to the lower than expected specificity in this cohort. Abnormal chest  
295 imaging findings in our study population may be due to inpatient populations in a tertiary referral

296 hospital being more likely to have acute illnesses such as pneumonia, and may also reflect a higher  
297 proportion of people with chronic lung disease in Lima, a city known to have high rates of air  
298 pollution, which has also been associated with a higher risk of tuberculosis<sup>39</sup>.

299

300 Increasing data demonstrates symptom screening is insensitive<sup>40</sup> and often poorly implemented<sup>24</sup>,  
301 and a high proportion of people with TB do not report symptoms<sup>25</sup>. The inclusion of individuals  
302 without cough or risk factors in our screening cohort was designed to try to understand the potential  
303 diagnostic yield of using qXR as a screening tool to identify unsuspected TB in hospitalized patients  
304 who may be presenting for various other reasons. In this setting, the diagnostic yield of screening  
305 people without symptoms or risk factors was lower than expected (based on outpatient studies). The  
306 specificity of qXR was high, suggesting it could be a valuable rule-out test in this setting. The low  
307 prevalence of TB in the screening cohort may be an artifact of the sample size or, it may be because  
308 people with TB who present to hospital are more likely to be sicker due to TB and thus present with  
309 cough (resulting in exclusion from the screening cohort) compared to the outpatient populations in  
310 prevalence surveys. The exclusion of people with TB contacts and prior TB from the screening cohort  
311 may have also led to the screening cohort being a lower risk group. The implementation of strategies  
312 such as FAST should take into account local epidemiology—including the pre-test probability of TB in  
313 people who do not report symptoms—to determine the optimal approach to determining who  
314 should undergo mWRD testing. Other strategies could also be evaluated, to increase the sensitivity of  
315 screening.

316

317 Strengths of our study include generating CAD diagnostic accuracy data from inpatient populations,  
318 including those who were symptomatic and/or high-risk and those without identified cough or TB risk

319 factors, also contributing to a body of literature seeking to optimize the FAST facility-based  
320 transmission prevention strategy in a medium incidence setting. We provide the first head-to-head  
321 evaluation of version 4 (soon to be commercially available) compared to qXR version 3, and also  
322 characterize other lung abnormalities detected. Limitations of our study are that digital CXR could  
323 only be performed on inpatients admitted through the emergency room and that with only 65  
324 patients who had culture-confirmed TB, the study only had sufficient power such that we can report  
325 the lower limit of the 95% CI for sensitivity is 0.885 with 95% precision.

326

327 In conclusion, qXR had high sensitivity but low specificity as a triage tool in the context of use as part  
328 of the FAST strategy in hospitalized adults admitted to a tertiary referral hospital in Peru who had a  
329 high prevalence of other radiographic lung abnormalities. While specificity was high in patients  
330 without cough or risk factors, the diagnostic yield of screening these patients was low in this setting.  
331 These findings further support the need for population and setting-specific thresholds for CAD  
332 programs and provide additional insights into the role for triage testing in hospitalized patients,  
333 which remains critical to detect and treat individual patients earlier and to curb hospital TB  
334 transmission.

335

336

337

338

339

340

341



342

343 Supporting information captions:

344

345 Table S1: Summary of Culture and Xpert result concordance.

346

347 Table S2: Diagnostic accuracy of qXR Version 3 and 4 for pre-specified subgroups in the triage cohort  
348 for which participants with prior TB, respiratory diseases, and HIV, were excluded

349

350 Table S3: Summary of Diagnostic Accuracy for qXR version 4 compared to the culture (primary) and  
351 Xpert (secondary) reference standards

352

353 Table S4: Lung abnormalities detected by qXR analysis for the Triage and Screening cohorts

354

355 Figure S1: Sensitivity of qXR version 3 for culture-confirmed pulmonary tuberculosis, overall and in  
356 prespecified stratified groups. p values are from Fisher's exact tests.

357

358 Figure S2: Specificity of qXR version 3 for culture-confirmed pulmonary tuberculosis, overall and in  
359 prespecified stratified groups. p values are from Fisher's exact tests.

360

## **Acknowledgements**

The authors were allowed to use the qXR algorithms free of charge qure.ai for research purposes, but the companies had no influence over the research question, nor any other aspect of the work carried out, and had no impact on the transparency of the article.

## **Funding**

This work was funded by the National Institutes of Health (NIAID R01 AI112748, PIs: Nardell and Tierney, and NIAID K23 AI132648-05, PI: Nathavitharana). RRN also acknowledges support from an American Society of Tropical Medicine and Hygiene Burroughs Wellcome Fellowship.

The funders had no role in study design, data collection, data analysis, data interpretation, writing of the report, or in the decision to submit for publication. The content is solely the responsibility of the authors and does not necessarily represent the views of the funders.

## **Competing interests**

The authors declare that no competing interests exist.

## **Data Availability Statement**

All relevant data are uploaded to the Harvard Dataverse repository.

## References

1. World Health Organization. *Global Tuberculosis Report 2022*. World Health Organization; 2022. Accessed December 5, 2022. <https://apps.who.int/iris/handle/10665/363752>
2. Subbaraman R, Jhaveri T, Nathavitharana RR. Closing gaps in the tuberculosis care cascade: an action-oriented research agenda. *J Clin Tuberc Other Mycobact Dis*. 2020;19:100144. doi:10.1016/j.jctube.2020.100144
3. Willingham FF, Schmitz TL, Contreras M, et al. Hospital control and multidrug-resistant pulmonary tuberculosis in female patients, Lima, Peru. *Emerg Infect Dis*. 2001;7(1):123-127. doi:10.3201/eid0701.010117
4. Assefa D, Belachew F, Wondimagegn G, Klinkenberg E. Missed pulmonary tuberculosis: a cross sectional study in the general medical inpatient wards of a large referral hospital in Ethiopia. *BMC Infect Dis*. 2019;19(1):60. doi:10.1186/s12879-019-3716-x
5. Gandhi NR, Weissman D, Moodley P, et al. Nosocomial transmission of extensively drug-resistant tuberculosis in a rural hospital in South Africa. *J Infect Dis*. 2013;207(1):9-17. doi:10.1093/infdis/jis631
6. Migliori GB, Nardell E, Yedilbayev A, et al. Reducing tuberculosis transmission: a consensus document from the World Health Organization Regional Office for Europe. *Eur Respir J*. 2019;53(6). doi:10.1183/13993003.00391-2019
7. Nardell EA. Transmission and Institutional Infection Control of Tuberculosis. *Cold Spring Harb Perspect Med*. 2015;6(2):a018192. doi:10.1101/cshperspect.a018192
8. World Health Organization. *Rapid Communication: Key Changes to the Treatment of Drug-Resistant Tuberculosis*. World Health Organization; 2022:6. Accessed June 6, 2022. <https://apps.who.int/iris/handle/10665/353743>
9. Paleckyte A, Dissanayake O, Mpagama S, Lipman MC, McHugh TD. Reducing the risk of tuberculosis transmission for HCWs in high incidence settings. *Antimicrob Resist Infect Control*. 2021;10(1):106. doi:10.1186/s13756-021-00975-y
10. Barrera E, Livchits V, Nardell E. F-A-S-T: a refocused, intensified, administrative tuberculosis transmission control strategy. *Int J Tuberc Lung Dis*. 2015;19(4):381-384. doi:10.5588/ijtld.14.0680
11. Tierney DB, Orvis E, Nathavitharana RR, et al. FAST tuberculosis transmission control strategy speeds the start of tuberculosis treatment at a general hospital in Lima, Peru. *Infect Control Hosp Epidemiol*. Published online October 6, 2021:1-7. doi:10.1017/ice.2021.422

12. Nathavitharana RR, Daru P, Barrera AE, et al. FAST implementation in Bangladesh: high frequency of unsuspected tuberculosis justifies challenges of scale-up. *Int J Tuberc Lung Dis*. 2017;21(9):1020-1025. doi:10.5588/ijtld.16.0794
13. Miller AC, Livchits V, Ahmad Khan F, et al. Turning Off the Tap: Using the FAST Approach to Stop the Spread of Drug-Resistant Tuberculosis in the Russian Federation. *The Journal of Infectious Diseases*. 2018;218(4):654-658. doi:10.1093/infdis/jiy190
14. Le H, Nguyen N, Tran P, et al. Process measure of FAST tuberculosis infection control demonstrates delay in likely effective treatment. *Int J Tuberc Lung Dis*. 2019;23(2):140-146. doi:10.5588/ijtld.18.0268
15. WHO. WHO Consolidated guidelines on tuberculosis, Module 2: Screening, Systematic screening for tuberculosis disease. Published online 2021. <https://reliefweb.int/report/world/who-consolidated-guidelines-tuberculosis-module-2-screening-systematic-screening>
16. Nathavitharana RR, Yoon C, Macpherson P, et al. Guidance for Studies Evaluating the Accuracy of Tuberculosis Triage Tests. *The Journal of Infectious Diseases*. 2019;220(Supplement\_3):S116-S125. doi:10.1093/infdis/jiz243
17. WHO. CHEST RADIOGRAPHY IN TUBERCULOSIS DETECTION. Published online 2016. <https://apps.who.int/iris/bitstream/handle/10665/252424/9789241511506-eng.pdf>
18. Kik SV, Gelaw SM, Ruhwald M, et al. *Diagnostic Accuracy of Chest X-Ray Interpretation for Tuberculosis by Three Artificial Intelligence-Based Software in a Screening Use-Case: An Individual Patient Meta-Analysis of Global Data*. *Infectious Diseases (except HIV/AIDS)*; 2022. doi:10.1101/2022.01.24.22269730
19. Gelaw SM, Kik SV, Ruhwald M, et al. *Diagnostic Accuracy of Three Computer-Aided Detection Systems for Detecting Pulmonary Tuberculosis on Chest Radiography When Used for Screening: Analysis of an International, Multicenter Migrants Screening Study*. *Radiology and Imaging*; 2022. doi:10.1101/2022.03.30.22273191
20. Qin ZZ, Mthiyane T, Barrett R, Moyo S, Zuma K, Manda S. Head-to-head evaluation of computer automated reading software to detect tuberculosis-related abnormalities from chest x-ray images using South Africa prevalence survey results. *Unpublished*.
21. Qin ZZ, Mhe SA, Sarker MS, et al. Can artificial intelligence (AI) be used to accurately detect tuberculosis (TB) from chest X-rays? An evaluation of five AI products for TB triaging in a high TB burden setting. :46.
22. Tavaziva G, Harris M, Abidi SK, et al. Chest X-ray Analysis With Deep Learning-Based Software as a Triage Test for Pulmonary Tuberculosis: An Individual Patient Data Meta-Analysis of Diagnostic Accuracy. *Clinical Infectious Diseases*. Published online July 21, 2021:ciab639. doi:10.1093/cid/ciab639

23. Nash M, Kadavigere R, Andrade J, et al. Deep learning, computer-aided radiography reading for tuberculosis: a diagnostic accuracy study from a tertiary hospital in India. *Sci Rep*. 2020;10(1):210. doi:10.1038/s41598-019-56589-3
24. Divala TH, Lewis J, Bulterys MA, Lutje V, Corbett EL, Schumacher SG. Missed opportunities for diagnosis and treatment in patients with TB symptoms: a systematic review. *Public Health Action*.:8.
25. Frascella B, Richards AS, Sossen B, et al. Subclinical Tuberculosis Disease—A Review and Analysis of Prevalence Surveys to Inform Definitions, Burden, Associations, and Screening Methodology. *Clinical Infectious Diseases*. 2021;73(3):e830-e841. doi:10.1093/cid/ciaa1402
26. Qin ZZ, Ahmed S, Sarker MS, et al. Tuberculosis detection from chest x-rays for triaging in a high tuberculosis-burden setting: an evaluation of five artificial intelligence algorithms. *The Lancet Digital Health*. 2021;3(9):e543-e554. doi:10.1016/S2589-7500(21)00116-3
27. Muyoyeta M, Maduskar P, Moyo M, et al. The Sensitivity and Specificity of Using a Computer Aided Diagnosis Program for Automatically Scoring Chest X-Rays of Presumptive TB Patients Compared with Xpert MTB/RIF in Lusaka Zambia. Wilkinson RJ, ed. *PLoS ONE*. 2014;9(4):e93757. doi:10.1371/journal.pone.0093757
28. Breuninger M, van Ginneken B, Philipsen RHHM, et al. Diagnostic Accuracy of Computer-Aided Detection of Pulmonary Tuberculosis in Chest Radiographs: A Validation Study from Sub-Saharan Africa. Hoshino Y, ed. *PLoS ONE*. 2014;9(9):e106381. doi:10.1371/journal.pone.0106381
29. Melendez J, Sánchez CI, Philipsen RHHM, et al. An automated tuberculosis screening strategy combining X-ray-based computer-aided detection and clinical information. *Sci Rep*. 2016;6(1):25265. doi:10.1038/srep25265
30. Yuen CM, Puma D, Millones AK, et al. Identifying barriers and facilitators to implementation of community-based tuberculosis active case finding with mobile X-ray units in Lima, Peru: a RE-AIM evaluation. *BMJ Open*. 2021;11(7):e050314. doi:10.1136/bmjopen-2021-050314
31. Nguyen LH, Codlin AJ, Vo LNQ, et al. An Evaluation of Programmatic Community-Based Chest X-ray Screening for Tuberculosis in Ho Chi Minh City, Vietnam. *TropicalMed*. 2020;5(4):185. doi:10.3390/tropicalmed5040185
32. Madhani F, Maniar RA, Burfat A, et al. Automated chest radiography and mass systematic screening for tuberculosis. *int j tuberc lung dis*. 2020;24(7):665-673. doi:10.5588/ijtld.19.0501
33. Mungai B, Ong'angò J, Ku CC, et al. Accuracy of computer-aided chest X-ray in community-based tuberculosis screening: Lessons from the 2016 Kenya National Tuberculosis Prevalence Survey. Majumdar S, ed. *PLOS Glob Public Health*. 2022;2(11):e0001272. doi:10.1371/journal.pgph.0001272

34. Bossuyt PM, Reitsma JB, Bruns DE, et al. STARD 2015: an updated list of essential items for reporting diagnostic accuracy studies. *BMJ*. Published online October 28, 2015:h5527. doi:10.1136/bmj.h5527
35. World Health Organization. *High-Priority Target Product Profile for New Tuberculosis Diagnostics: Report of a Consensus Meeting.*; 2014.
36. Albert H, Nathavitharana RR, Isaacs C, Pai M, Denkinger CM, Boehme CC. Development, roll-out and impact of Xpert MTB/RIF for tuberculosis: what lessons have we learnt and how can we do better? *Eur Respir J*. 2016;48(2):516-525. doi:10.1183/13993003.00543-2016
37. Qin ZZ, Sander MS, Rai B, et al. Using artificial intelligence to read chest radiographs for tuberculosis detection: A multi-site evaluation of the diagnostic accuracy of three deep learning systems. *Sci Rep*. 2019;9(1):15000. doi:10.1038/s41598-019-51503-3
38. Khan FA, Majidulla A, Tavaziva G, et al. Chest x-ray analysis with deep learning-based software as a triage test for pulmonary tuberculosis: a prospective study of diagnostic accuracy for culture-confirmed disease. *The Lancet Digital Health*. 2020;2(11):e573-e581. doi:10.1016/S2589-7500(20)30221-1
39. Lin YJ, Lin HC, Yang YF, et al. Association Between Ambient Air Pollution and Elevated Risk of Tuberculosis Development. *IDR*. 2019;Volume 12:3835-3847. doi:10.2147/IDR.S227823
40. Yoon C, Dowdy DW, Esmail H, MacPherson P, Schumacher SG. Screening for tuberculosis: time to move beyond symptoms. *The Lancet Respiratory Medicine*. 2019;7(3):202-204. doi:10.1016/S2213-2600(19)30039-6
41. Mungai BN, Joekes E, Masini E, et al. 'If not TB, what could it be?' Chest X-ray findings from the 2016 Kenya Tuberculosis Prevalence Survey. *Thorax*. 2021;76(6):607-614. doi:10.1136/thoraxjnl-2020-216123
42. Engle E, Gabrielian A, Long A, Hurt DE, Rosenthal A. Performance of Qure.ai automatic classifiers against a large annotated database of patients with diverse forms of tuberculosis. Hong JC, ed. *PLoS ONE*. 2020;15(1):e0224445. doi:10.1371/journal.pone.0224445
43. Singh R, Kalra MK, Nitiwarangkul C, et al. Deep learning in chest radiography: Detection of findings and presence of change. Eapen GA, ed. *PLoS ONE*. 2018;13(10):e0204155. doi:10.1371/journal.pone.0204155

Patients enrolled with cough or TB risk factors (n=964)

Excluded (n= 475)

- ◆ Not admitted to emergency department (n= 378)
- ◆ CXR missing/deleted/not completed (n= 65)
- ◆ Other reasons for not undergoing digital CXR (n=32)

Triage cohort (n=489)

Removed from analysis (n=50)

- Currently on anti-TB drugs (n=45)
- On anti-TB drugs in last year (n=5)

Did not have microbiological tests (n= 20)

Microbiological testing (n=419)

- ◆ Culture positive (65/387)
- ◆ Xpert positive (69/398)
- ◆ Both Xpert and Culture positive (55/366)

Patients enrolled without cough or TB risk factors  
Screening cohort (n=220)

Excluded (n=36)

- Household contact of a person with TB (n=27)
- No microbiological testing (n=9)

Microbiological testing (n=184)

- ◆ Culture testing (n=172)
  - Negative (n=172)
- ◆ Xpert testing (n=180)
  - Negative (n=179)
  - Positive (n=1)

| Category and Variable    | nN      | p-value |  | Specificity (95% CI) |
|--------------------------|---------|---------|--|----------------------|
| <b>Demographics</b>      |         |         |  |                      |
| Male                     | 48/188  | 0.052   |  | 0.26 (0.20, 0.32)    |
| Female                   | 54/134  |         |  | 0.40 (0.32, 0.49)    |
| <40 years                | 51/150  | 0.571   |  | 0.34 (0.27, 0.42)    |
| >40 years                | 51/172  |         |  | 0.30 (0.23, 0.37)    |
| <b>Risk Factors</b>      |         |         |  |                      |
| No Prior TB              | 84/207  | 0.001   |  | 0.41 (0.34, 0.48)    |
| Prior TB                 | 18/114  |         |  | 0.16 (0.10, 0.24)    |
| HIV Negative             | 89/294  | 0.095   |  | 0.30 (0.25, 0.36)    |
| HIV Positive             | 15/28   |         |  | 0.46 (0.28, 0.66)    |
| <b>Clinical Symptoms</b> |         |         |  |                      |
| Cough > 2 weeks          | 26/132  | 0.006   |  | 0.20 (0.13, 0.28)    |
| Cough < 2 weeks          | 69/171  |         |  | 0.40 (0.33, 0.48)    |
| Night sweats             | 55/182  | 0.649   |  | 0.30 (0.24, 0.38)    |
| No Night sweats          | 47/140  |         |  | 0.34 (0.26, 0.42)    |
| Fever                    | 58/192  | 0.645   |  | 0.30 (0.24, 0.37)    |
| No Fever                 | 44/130  |         |  | 0.34 (0.26, 0.43)    |
| Weight Loss              | 55/218  | 0.012   |  | 0.25 (0.20, 0.32)    |
| No Weight Loss           | 47/102  |         |  | 0.46 (0.36, 0.56)    |
| Overall                  |         |         |  |                      |
| Overall                  | 102/322 |         |  | 0.32 (0.27, 0.37)    |

0 .2 .4 .6 .8 1



**Category**

**and Variable**

**n/N p-value**

**Sensitivity**

**(95% CI)**

medRxiv preprint doi: <https://doi.org/10.1101/2023.05.17.23290110>; this version posted May 24, 2023. The copyright holder for this preprint (which was not certified by peer review) is the author/funder, who has granted medRxiv a license to display the preprint in perpetuity. It is made available under a [CC-BY 4.0 International license](https://creativecommons.org/licenses/by/4.0/).

**Demographics**

|           |       |       |  |                   |
|-----------|-------|-------|--|-------------------|
| Male      | 44/48 | 1.000 |  | 0.92 (0.80, 0.98) |
| Female    | 15/17 |       |  | 0.88 (0.64, 0.98) |
| <40 years | 35/38 | 1.000 |  | 0.92 (0.79, 0.98) |
| >40 years | 24/27 |       |  | 0.89 (0.71, 0.98) |

**Risk Factors**

|              |       |       |  |                   |
|--------------|-------|-------|--|-------------------|
| No Prior TB  | 46/52 | 0.828 |  | 0.89 (0.77, 0.96) |
| Prior TB     | 13/13 |       |  | 1.00 (0.75, 1.00) |
| HIV Negative | 54/58 | 0.766 |  | 0.93 (0.83, 0.98) |
| HIV Positive | 5/7   |       |  | 0.71 (0.29, 0.96) |

**Clinical Symptoms**

|                 |       |       |  |                   |
|-----------------|-------|-------|--|-------------------|
| Cough > 2 weeks | 37/39 | 0.850 |  | 0.95 (0.83, 0.99) |
| Cough < 2 weeks | 20/24 |       |  | 0.83 (0.63, 0.95) |
| Night sweats    | 39/45 | 0.848 |  | 0.87 (0.73, 0.95) |
| No Night sweats | 20/20 |       |  | 1.00 (0.83, 1.00) |
| Fever           | 46/52 | 0.823 |  | 0.89 (0.77, 0.96) |
| No Fever        | 12/12 |       |  | 1.00 (0.73, 1.00) |
| Weight Loss     | 49/55 | 1.000 |  | 0.89 (0.78, 0.96) |
| No Weight Loss  | 9/9   |       |  | 1.00 (0.66, 1.00) |

**Test Results**

|                |       |       |  |                   |
|----------------|-------|-------|--|-------------------|
| Smear Positive | 38/41 | 0.830 |  | 0.93 (0.80, 0.98) |
| Smear Negative | 13/16 |       |  | 0.81 (0.54, 0.96) |

**Overall**

|         |       |  |  |                   |
|---------|-------|--|--|-------------------|
| Overall | 59/65 |  |  | 0.91 (0.81, 0.96) |
|---------|-------|--|--|-------------------|

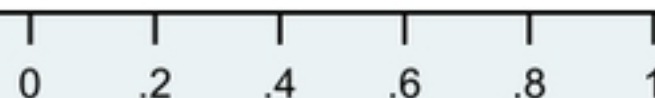

**Category  
and Variable**

**n/N p-value**

**Sensitivity  
(95% CI)**

medRxiv preprint doi: <https://doi.org/10.1101/2023.05.17.23290110>; this version posted May 24, 2023. The copyright holder for this preprint (which was not certified by peer review) is the author/funder, who has granted medRxiv a license to display the preprint in perpetuity. It is made available under a [CC-BY 4.0 International license](https://creativecommons.org/licenses/by/4.0/).

**Demographics**

|           |       |       |  |                   |
|-----------|-------|-------|--|-------------------|
| Male      | 46/48 | 1.000 |  | 0.96 (0.86, 0.99) |
| Female    | 16/17 |       |  | 0.94 (0.71, 1.00) |
| <40 years | 37/38 | 1.000 |  | 0.97 (0.86, 1.00) |
| >40 years | 25/27 |       |  | 0.93 (0.76, 0.99) |

**Risk Factors**

|              |       |       |  |                   |
|--------------|-------|-------|--|-------------------|
| No Prior TB  | 49/52 | 1.000 |  | 0.94 (0.84, 0.99) |
| Prior TB     | 13/13 |       |  | 1.00 (0.75, 1.00) |
| HIV Negative | 57/58 | 0.764 |  | 0.98 (0.91, 1.00) |
| HIV Positive | 5/7   |       |  | 0.71 (0.29, 0.96) |

**Clinical Symptoms**

|                 |       |       |  |                   |
|-----------------|-------|-------|--|-------------------|
| Cough > 2 weeks | 37/39 | 1.000 |  | 0.95 (0.83, 0.99) |
| Cough < 2 weeks | 23/24 |       |  | 0.96 (0.79, 1.00) |
| Night sweats    | 42/45 | 1.000 |  | 0.93 (0.82, 0.99) |
| No Night sweats | 20/20 |       |  | 1.00 (0.83, 1.00) |
| Fever           | 49/52 | 1.000 |  | 0.94 (0.84, 0.99) |
| No Fever        | 12/12 |       |  | 1.00 (0.73, 1.00) |
| Weight Loss     | 52/55 | 1.000 |  | 0.94 (0.85, 0.99) |
| No Weight Loss  | 9/9   |       |  | 1.00 (0.66, 1.00) |

**Test Results**

|                |       |       |  |                   |
|----------------|-------|-------|--|-------------------|
| Smear Positive | 40/41 | 0.833 |  | 0.98 (0.87, 1.00) |
| Smear Negative | 14/16 |       |  | 0.88 (0.62, 0.98) |

**Overall**

|         |       |  |  |                   |
|---------|-------|--|--|-------------------|
| Overall | 62/65 |  |  | 0.95 (0.87, 0.99) |
|---------|-------|--|--|-------------------|

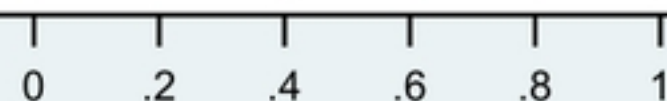

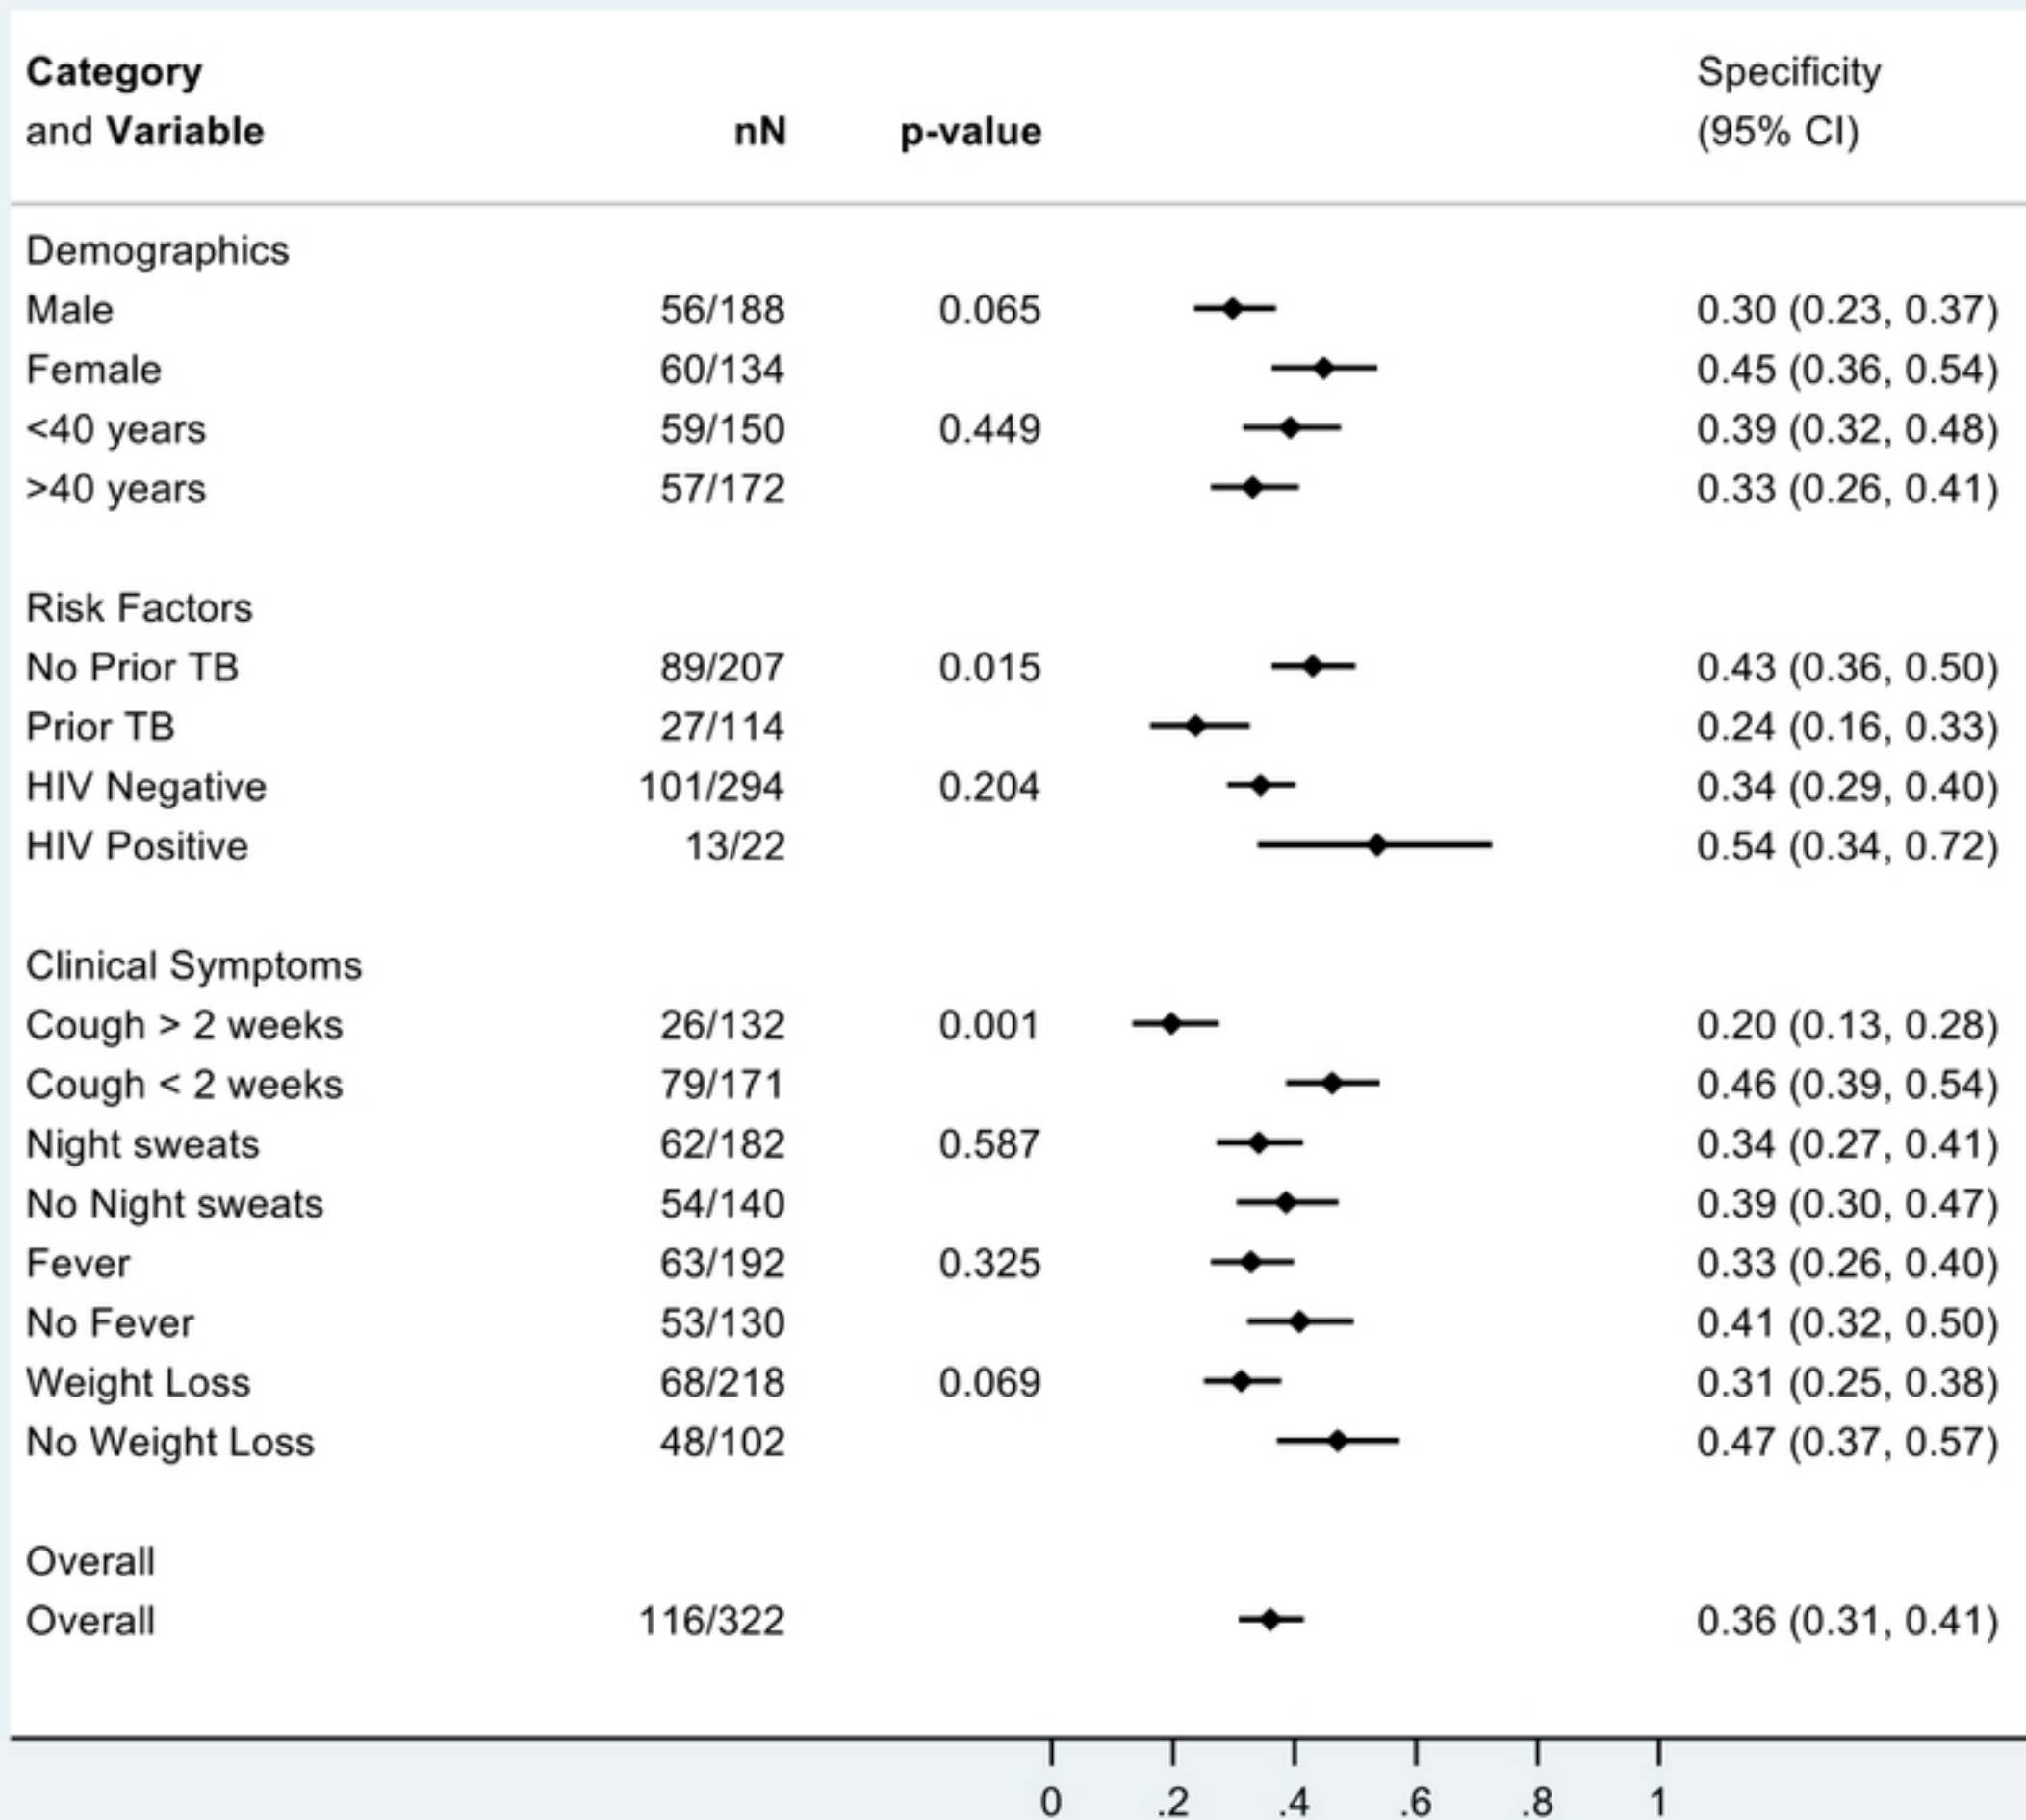

0 .2 .4 .6 .8 1

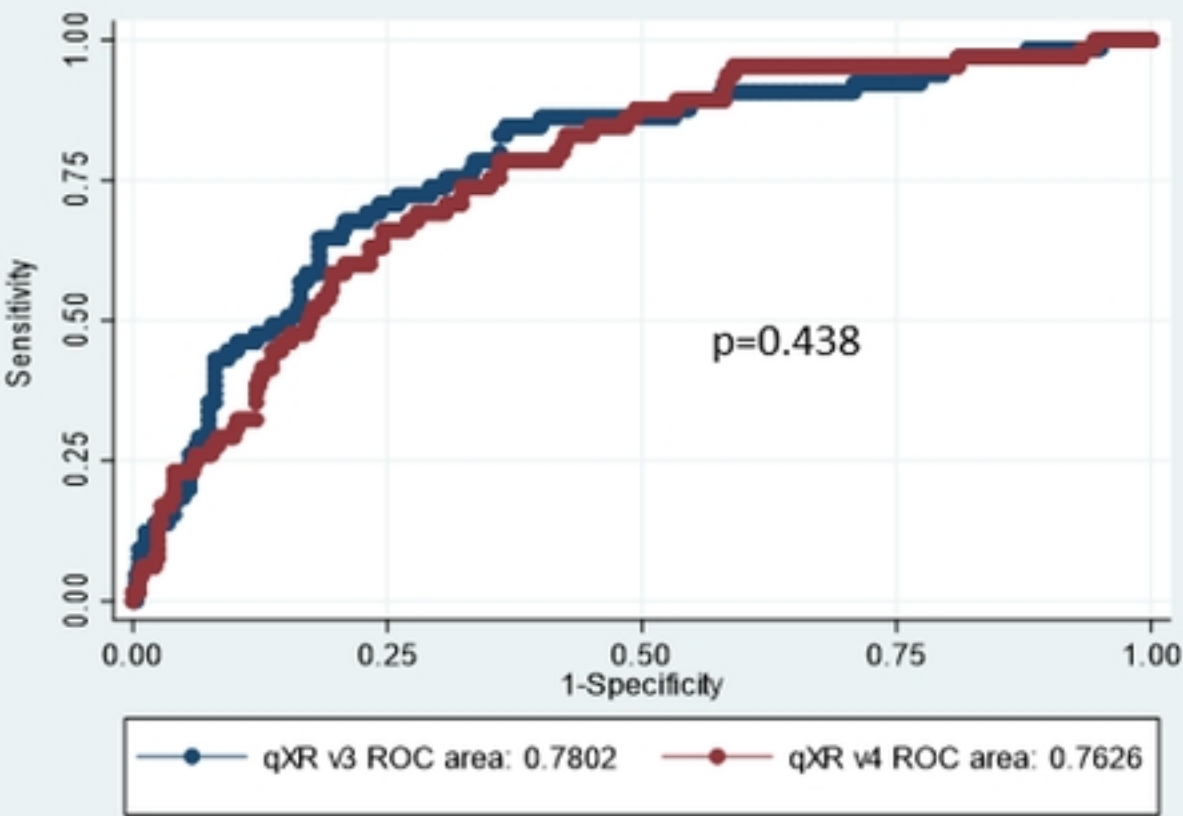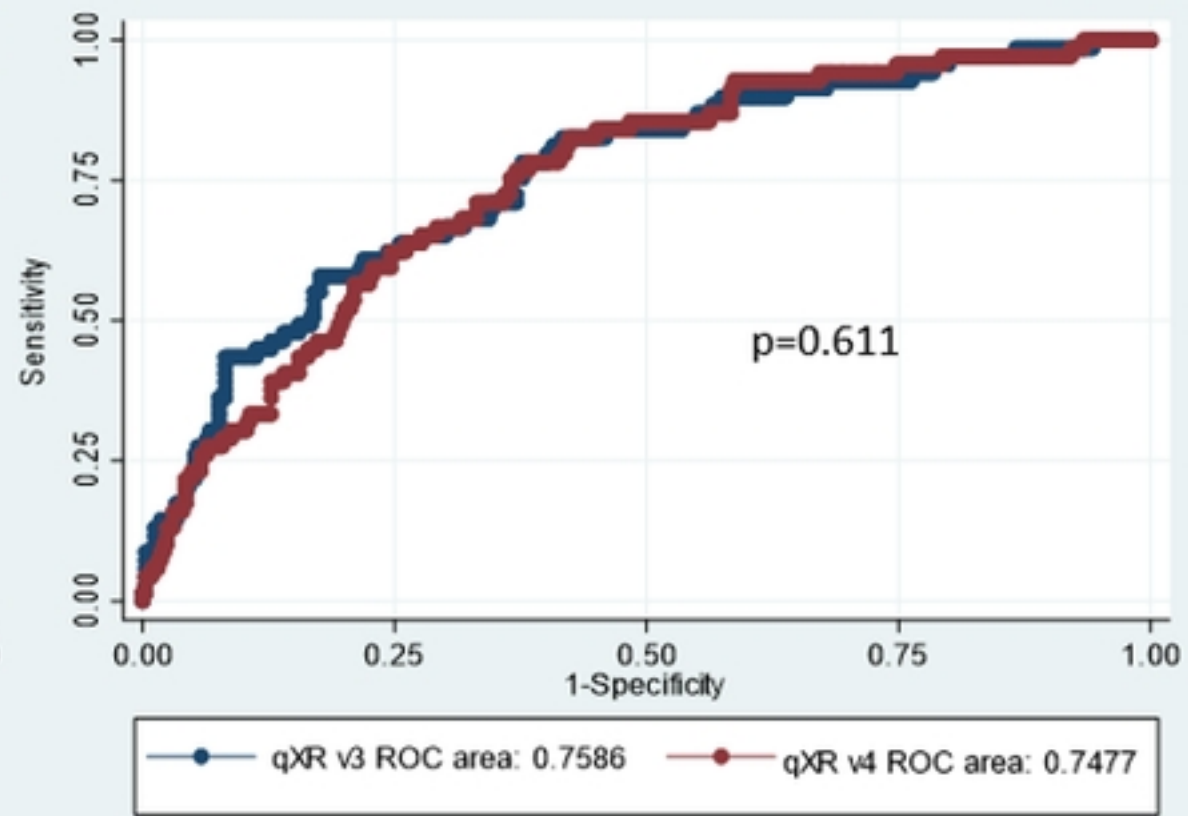

Source: https://www.medrxiv.org/content/10.1101/2023.05.17.23290110v1.full.pdf
