1 **Accuracy of digital chest x-ray analysis with artificial intelligence software as a triage and screening**  
2 **tool in hospitalized patients being evaluated for tuberculosis in Lima, Peru.**

3

4 Amanda Biewer<sup>1\*</sup>, Christine Tzelios<sup>2\*</sup>, Karen Tintaya<sup>3</sup>, Betsabe Roman<sup>3</sup>, Shelley Hurwitz<sup>2</sup>, Courtney M.  
5 Yuen<sup>4</sup>, Carole D. Mitnick<sup>4</sup>, Edward Nardell<sup>4</sup>, Leonid Lecca<sup>3</sup>, Dylan B. Tierney<sup>4,5</sup>, Ruvandhi R.  
6 Nathavitharana<sup>1#</sup>

7

8 <sup>1</sup> Beth Israel Deaconess Medical Center and Harvard Medical School, Boston, MA

9 <sup>2</sup> Harvard Medical School, Boston, MA

10 <sup>3</sup> Socios en Salud, Lima, Peru

11 <sup>4</sup> Brigham and Women's Hospital and Harvard Medical School, Boston, MA

12 <sup>5</sup> Massachusetts Department of Public Health, Boston, MA

13 \* contributed equally

14 # corresponding author

15

16

17 **Abstract**

18 Introduction:

19 Tuberculosis (TB) transmission in healthcare facilities is common in high-incidence countries. Yet, the  
20 optimal approach for identifying inpatients who may have TB is unclear. We evaluated the diagnostic  
21 accuracy of qXR (Qure.ai, India) computer-aided detection (CAD) software versions 3.0 and 4.0 (v3  
22 and v4) as a triage and screening tool within the FAST (Find cases Actively, Separate safely, and Treat  
23 effectively) transmission control strategy.

24

25 Methods:

26 We prospectively enrolled two cohorts of patients admitted to a tertiary hospital in Lima, Peru: one  
27 group had cough or TB risk factors (triage) and the other did not report cough or TB risk factors  
28 (screening). We evaluated the sensitivity and specificity of qXR for the diagnosis of pulmonary TB

29 using culture and Xpert as primary and secondary reference standards, including stratified analyses  
30 based on risk factors.

31

32 Results:

33 In the triage cohort (n=387), qXR v4 sensitivity was 0.91 (59/65, 95% CI 0.81-0.97) and specificity was  
34 0.32 (103/322, 95% CI 0.27-0.37) using culture as reference standard. There was no difference in the  
35 area under the receiver-operating-characteristic curve (AUC) between qXR v3 and qXR v4 with either  
36 a culture or Xpert reference standard. In the screening cohort (n=191), only one patient had a  
37 positive Xpert result, but specificity in this cohort was high (>90%). A high prevalence of radiographic  
38 lung abnormalities, most notably opacities (81%), consolidation (62%), or nodules (58%), was  
39 detected by qXR on digital CXR images from the triage cohort.

40

41 Conclusions:

42 qXR had high sensitivity but low specificity as a triage in hospitalized patients with cough or TB risk  
43 factors. Screening patients without cough or risk factors in this setting had a low diagnostic yield.  
44 These findings further support the need for population and setting-specific thresholds for CAD  
45 programs.

46

47

48

49

50

51

## 52 **Introduction**

53 Diagnosis remains the largest gap in the tuberculosis (TB) cascade of care. In 2021, of the 10.6 million  
54 people estimated to become sick due to TB, only 6.4 million were diagnosed and notified to national  
55 notification systems(1). Efforts to increase and accelerate diagnoses are critical to prevent severe  
56 disease, avert TB deaths, and halt ongoing transmission(2). Healthcare facilities are known hotspots  
57 for TB transmission in high-incidence settings(3–7). Globally, the rate of TB disease among healthcare  
58 workers is estimated to be at least double that of the general adult population, suggesting significant  
59 transmission in health facilities(8,9). The FAST (Find cases Actively, Separate safely, and Treat  
60 effectively) strategy was developed to reduce TB transmission in healthcare settings, based on the  
61 principle that most transmission occurs from patients with unsuspected and thus undiagnosed TB,  
62 including drug-resistant strains(10). FAST relies on identifying potentially infectious patients, typically  
63 with cough screening, followed by rapid sputum-based molecular tests that include first line  
64 resistance testing to enable prompt initiation of effective treatment(7,10). FAST has been  
65 implemented in a variety of settings, including Peru, Bangladesh, Russia, and Vietnam(11–14). Given  
66 the slow scale up of rapid molecular tests(1), due to barriers such as cost, optimizing screening  
67 approaches for the FAST strategy is critical for its implementation success.

68

69 Triage is the process of making clinical decisions based on symptoms, signs, risk factors, or test  
70 results(15). Rapid and accurate triage tests play an important role in identifying patients requiring  
71 further diagnostic evaluation among those with symptoms or risk factors for disease(16). Screening  
72 similarly involves non-diagnostic testing to distinguish between people who likely have the disease  
73 from those who are unlikely to have the disease, typically in a population who do not have  
74 symptoms(15). There is a long history of using chest radiography (CXR) to screen for pulmonary TB,

75 but its utility in high TB incidence settings has been limited by the scarcity of skilled radiologists to  
76 interpret images(17). The advent of digital radiography coupled with computer aided detection (CAD)  
77 software eliminates this potential barrier, making it more feasible to implement CXR for triage or  
78 screening in resource limited settings. CAD uses artificial intelligence algorithms to analyze  
79 radiographs for abnormalities consistent with TB. CAD is now recommended by the World Health  
80 Organization (WHO) as an alternative to human readers(17). Nonetheless, while CAD sensitivity for  
81 both triage and screening is typically >90%, CAD specificity varies widely, from 23%–66% for  
82 screening(15,18,19) and 25%–79% for triage(18,20) when compared to a microbiological reference  
83 standard.

84

85 Questions remain regarding the optimal approach for using CAD to identify potentially infectious  
86 people with TB, particularly in hospital settings. A retrospective case-control study evaluating CAD in  
87 patients presenting with respiratory symptoms to a tertiary care hospital in India demonstrated  
88 moderate sensitivity and specificity (71% and 80% respectively) for the detection of pulmonary  
89 TB(21). However, TB prevalence surveys reveal a high proportion of people diagnosed with  
90 pulmonary TB who do not report symptoms(22), highlighting poor implementation and yield of  
91 symptom screening(23). Moreover, many CAD studies have focused on triage of outpatients  
92 presenting with symptoms(24–27). Although there are some examples of CAD screening programs  
93 that are not contingent on symptom screening, these have been community-based(28–31).

94

95 The aim of this study was to evaluate the diagnostic accuracy of digital CXR with CAD software as a  
96 tool for: 1) triage—among patients with cough or TB risk factors—and 2) screening—among patients

97 without cough or TB risk factors—to identify admitted patients who should undergo molecular TB  
98 testing in a tertiary care hospital in Lima, Peru.

99

## 100 **Methods**

### 101 Study design and participants

102 We conducted a cross-sectional diagnostic accuracy study that was embedded in a larger prospective  
103 study evaluating FAST implementation at Hospital Nacional Hipolito Unanue (HNHU), a 700-bed  
104 public, tertiary-care referral hospital in Lima, Peru (<https://clinicaltrials.gov/ct2/show/NCT02355223>).  
105 Patients admitted to HNHU from January 18th 2018 to December 31st 2019 were consecutively  
106 screened by the FAST implementation team study staff using a standardized questionnaire upon  
107 facility admission, as previously described(11). This diagnostic accuracy sub-study consisted of two  
108 cohorts: triage and screening. Individuals who were eligible for the parent FAST study were eligible  
109 for the triage cohort; adults ( $\geq 18$  years old) who, upon questioning by the study team, reported  
110 either cough of any duration and/or the following risk factors for TB: contact with someone  
111 diagnosed with pulmonary TB, a current active TB diagnosis (however patients who were already on  
112 TB treatment were subsequently excluded from this diagnostic accuracy sub-study), or a history of  
113 prior active TB. The screening cohort consisted of individuals who were assessed for eligibility for the  
114 parent FAST study but were ineligible because they did not have cough or TB risk factors. The  
115 rationale for adding a screening cohort to the diagnostic accuracy sub-study was to see the number  
116 of patients admitted in our setting in Lima without identified TB risk who may have undiagnosed TB  
117 (based on prevalence survey data from other higher TB incidence settings)(22). Every one in five  
118 patients with a negative symptom or TB risk screen (undertaken by our FAST implementation study

119 team) was randomly approached for enrollment into the screening cohort for this diagnostic sub-  
120 study.

121

#### 122 Ethics statement

123 The study was approved by the Institutional Review Boards of HNHU and Brigham and Women's  
124 Hospital. Written informed consent was obtained from all patients. Participants were assigned a  
125 unique study ID number, recorded on data collection forms and clinical specimens to facilitate data  
126 linkage; names and other obvious identifiers were not used on data collection forms thus authors did  
127 not have access to information that could identify individual participants during or after data  
128 collection.

129

#### 130 Study procedures, data collection, and outcome classification

131 On the day of admission, patients in both cohorts who were admitted through the emergency room  
132 underwent posterior-anterior digital CXR and study staff collected at least 2 sputum samples for TB  
133 testing using smear microscopy, mycobacterial culture, Xpert MTB/RIF (Xpert, Cepheid, Sunnyvale,  
134 CA), and/or GenoType MTBDRplus line probe assay (Hain, Germany). De-identified CXR images were  
135 electronically transferred for automated analysis and were blinded to other demographic and clinical  
136 data including the results of other TB testing by the developers of qXR (qure.ai, Mumbai, India) who  
137 ran versions 3.0 (v3) and 4.0 (v4) on all images. CXR was obtained prospectively but qXR results were  
138 not used to guide clinical management. Information on socio-demographic and clinical variables  
139 including current and prior TB history, co-morbidities, and microbiological test results, was collected  
140 at the time of enrollment, or retrieved from the medical records using standardized case report  
141 forms. Culture and Xpert results were classified separately as binary variables (positive or negative for

142 *Mycobacterium tuberculosis*). If a patient had more than one culture result and at least one was  
143 positive, the binary result was classified as positive and the same applied to Xpert results.

144

#### 145 Analyses

146 For our primary diagnostic accuracy analyses, the diagnosis of pulmonary TB in both the triage and  
147 screening cohorts was established by the presence of a sputum culture that grew *Mycobacterium*  
148 *tuberculosis*. For our secondary diagnostic accuracy analyses, the diagnosis of pulmonary TB in both  
149 the triage and screening cohorts was established by the presence of a positive sputum Xpert result.  
150 Analyses using qXR v4 are presented in the main manuscript and qXR v3 are presented in the  
151 supplementary data. qXR sensitivity and specificity (with exact 95% C.I.s) for pulmonary TB were  
152 calculated using the manufacturer's prespecified thresholds (0.5 for v3 and v4) per STARD guidelines  
153 (see Appendix for STARD checklist)(32). DeLong's non-parametric method was applied to compare  
154 differences between the areas under the receiver operating characteristic curve (AUC) for the two  
155 qXR software versions. We also estimated the specificity at the threshold score at which sensitivity  
156 was closest to 90% (WHO triage test minimum TPP recommended criteria)(33). Pre-specified  
157 sensitivity analyses were designed to examine qXR accuracy when certain groups known to have  
158 increased risk for TB were excluded: people with HIV, people with prior TB, and people with other  
159 respiratory diseases (asthma or bronchiectasis).

160

161 Using Fisher's exact test, we assessed performance differences in prespecified groups with  
162 characteristics or risk factors that may impact diagnostic test performance: male sex, older age, prior  
163 TB, HIV co-infection, other respiratory disease co-morbidities, presence of TB symptoms in WHO  
164 symptom screen (cough, fever, night sweats, weight loss), and higher-grade sputum smear result.

165 Analyses were completed using STATA/IC version 16 (StataCorp. 2019. Stata Statistical Software:  
166 Release 16. College Station, TX: StataCorp LLC.).

167

## 168 **Results**

169 During the study period we enrolled 1006 patients admitted to HHU who had cough or TB risk  
170 factors, of whom 489 underwent digital CXR in the triage cohort (Figure 1). Participants who were  
171 taking TB treatment or had been on TB treatment within one year of enrollment (n=50; 10%) were  
172 excluded as were those who had no microbiological testing (n=20; 4%). We enrolled 220 individuals  
173 without cough or TB risk factors in the screening cohort. Screening participants who were household  
174 contacts of people who experienced TB were excluded (n=27; 13%) as were those who had no  
175 microbiological testing (n=9; 4%).

176

177 Figure 1: Study Flow Diagram

178

179

### 180 **Triage cohort**

#### 181 Demographics

182 Of the 419 participants in the triage cohort, 387 (93%) had a mycobacterial culture result that was  
183 positive in 65 (17%) participants, of whom 41 (63%) also had positive sputum-smear microscopy  
184 results. In this cohort, 398 (95%) had an Xpert MTB/RIF result; it was positive in 69 (17%), of whom 39  
185 (57%) had positive smear microscopy. Culture and Xpert results were largely concordant, with high  
186 Xpert sensitivity for both smear-positive and negative culture confirmed TB (95% and 86%), although  
187 Xpert was positive in some people who did not have culture or who had a negative culture (Table S1a  
188 and b). Compared to participants without TB (based on sputum culture results), participants with



189 culture confirmed TB were more likely to be younger, male, have a history of incarceration, report  
 190 cough longer than 2 weeks, fever, or weight loss, and not have a history of any respiratory diseases or  
 191 a prior history of TB (Table 1). The primary reason for excluding patients from the triage cohort was  
 192 that they were not admitted through the emergency department (n=397/517), which was required  
 193 for us to be able to obtain dCXR. Differences between included versus excluded patients are  
 194 described in Table S2.

195  
 196 Table 1: Demographic and clinical characteristics of enrolled participants

|                                                    | Triage Patients    |                           |                          |                                   | Screening* Patients |                         |                  |
|----------------------------------------------------|--------------------|---------------------------|--------------------------|-----------------------------------|---------------------|-------------------------|------------------|
|                                                    | Overall (n=419)    | TB <sup>^</sup><br>(n=65) | No TB<br>(n=322)         | No Culture<br>Performed<br>(n=32) | P-<br>value**       | Overall<br>(n=184)      | P-<br>value**    |
| <b>Median Age (years,<br/>interquartile range)</b> | 41.35 (26.8, 56.6) | 35.34<br>(24.0,<br>48.6)  | 42.01<br>(27.5,<br>57.0) | 44.68 (31.7,<br>63.3)             | <b>0.003</b>        | 36.19 (25.19,<br>50.53) | <b>0.015</b>     |
| <b>Sex, No (%)</b>                                 |                    |                           |                          |                                   | <b>0.025</b>        |                         | <b>&lt;0.001</b> |
| Female                                             | 164 (39.1)         | 17 (26.1)                 | 134 (41.6)               | 13 (40.6)                         |                     | 111 (60.3)              |                  |
| Male                                               | 255 (60.9)         | 48 (73.9)                 | 188 (58.4)               | 19 (59.4)                         |                     | 73 (39.7)               |                  |
| <b>History of Previous TB,<br/>No (%)</b>          |                    |                           |                          |                                   | <b>0.014</b>        |                         | <b>&lt;0.001</b> |
| Yes                                                | 140 (33.4)         | 13 (20.0)                 | 114 (35.4)               | 13 (40.6)                         |                     | 0 (0.00)                |                  |
| No                                                 | 278 (66.4)         | 52 (80.0)                 | 207 (64.3)               | 19 (59.4)                         |                     | 184 (100)               |                  |
| Refused                                            | 1 (0.20)           | 0 (0.00)                  | 1 (0.3)                  | 0 (0.00)                          |                     | 0 (0.00)                |                  |
| <b>HIV, No (%)</b>                                 |                    |                           |                          |                                   | 0.635               |                         | <b>&lt;0.001</b> |
| Yes                                                | 36 (8.6)           | 7 (10.8)                  | 28 (8.7)                 | 1 (3.1)                           |                     | 1 (0.5)                 |                  |
| No                                                 | 383 (91.4)         | 58 (89.2)                 | 294 (91.3)               | 31 (96.9)                         |                     | 183 (99.5)              |                  |
| <b>Smoking, No (%)</b>                             |                    |                           |                          |                                   | 0.501               |                         | 0.637            |
| Never                                              | 202 (48.2)         | 28 (43.0)                 | 162 (50.3)               | 12 (37.5)                         |                     | 99 (53.8)               |                  |
| Former                                             | 161 (38.4)         | 30 (46.2)                 | 116 (36.0)               | 15 (46.9)                         |                     | 51 (27.7)               |                  |
| Current                                            | 56 (13.4)          | 7 (10.8)                  | 44 (13.7)                | 5 (15.6)                          |                     | 34 (18.5)               |                  |
| <b>Alcohol, No (%)</b>                             |                    |                           |                          |                                   | 0.092               |                         | <b>&lt;0.001</b> |
| Never                                              | 107 (25.5)         | 9 (13.9)                  | 90 (28.0)                | 8 (25.0)                          |                     | 32 (17.3)               |                  |
| Former                                             | 121 (28.9)         | 22 (33.9)                 | 90 (28.0)                | 9 (28.1)                          |                     | 33 (18.0)               |                  |
| Current                                            | 189 (45.1)         | 32 (49.2)                 | 142 (44.0)               | 15 (46.9)                         |                     | 119 (64.7)              |                  |
| Missing                                            | 2 (0.5)            | 2 (3.0)                   | 0 (0.00)                 | 0 (0.00)                          |                     | 0 (0.00)                |                  |
| <b>Respiratory Disease, No<br/>(%)</b>             |                    |                           |                          |                                   | <b>0.047</b>        |                         | <b>0.001</b>     |
| Asthma                                             | 28 (6.7)           | 1 (1.5)                   | 26 (8.1)                 | 2 (6.3)                           |                     | 2 (1.1)                 |                  |
| Bronchiectasis                                     | 13 (3.1)           | 0 (0.00)                  | 11 (3.4)                 | 1 (3.1)                           |                     | 0 (0.00)                |                  |
| None                                               | 378 (90.2)         | 64 (98.5)                 | 285 (88.5)               | 29 (90.6)                         |                     | 182 (98.9)              |                  |
| <b>Diabetes, Type II, No<br/>(%)</b>               |                    |                           |                          |                                   | 0.842               |                         | 1.000            |
| Yes                                                | 58 (13.8)          | 9 (13.9)                  | 42 (13.0)                | 7 (21.9)                          |                     | 25 (13.6)               |                  |

|                                                         |            |           |            |           |                  |            |                  |
|---------------------------------------------------------|------------|-----------|------------|-----------|------------------|------------|------------------|
| No                                                      | 361 (86.2) | 56 (86.1) | 280 (87.0) | 25 (78.1) |                  | 159 (86.4) |                  |
| <b>Prison, No (%)</b>                                   |            |           |            |           |                  |            |                  |
| Yes                                                     | 62 (14.8)  | 16 (24.6) | 41 (12.7)  | 5 (15.6)  | <b>0.020</b>     | 3 (1.6)    | <b>&lt;0.001</b> |
| No                                                      | 357 (85.2) | 49 (75.4) | 281 (87.3) | 27 (84.4) |                  | 181 (98.4) |                  |
| <b>Household Contact of TB positive patient, No (%)</b> |            |           |            |           |                  |            |                  |
| Yes                                                     | 159 (38.0) | 27 (41.5) | 119 (37.0) | 13 (40.6) | 0.754            | -          | -                |
| No                                                      | 256 (61.1) | 38 (58.5) | 199 (61.8) | 19 (59.4) |                  |            |                  |
| Missing                                                 | 4 (0.9)    | 0 (0.00)  | 4 (1.2)    | 0 (0.00)  |                  |            |                  |
| <b>Smear Status, No (%)</b>                             |            |           |            |           |                  |            |                  |
| Positive                                                | 48 (11.5)  | 41 (63.1) | 4 (1.2)    | 3 (9.4)   | <b>&lt;0.001</b> | 0 (0.00)   | <b>&lt;0.001</b> |
| Negative                                                | 363 (86.6) | 16 (24.6) | 318 (98.8) | 29 (90.6) |                  | 183 (99.5) |                  |
| Missing                                                 | 8 (1.9)    | 8 (12.3)  | 0 (0.00)   | 0 (0.00)  |                  | 1 (0.5)    |                  |
| <b>TB-associated Symptoms</b>                           |            |           |            |           |                  |            |                  |
| <b>Cough, No (%)</b>                                    |            |           |            |           |                  |            |                  |
| <i>Length, in Weeks</i>                                 |            |           |            |           |                  |            |                  |
| Less than 1 week                                        | 102 (24.4) | 8 (12.3)  | 90 (28.0)  | 4 (12.5)  | <b>0.003</b>     | -          | -                |
| 1-2 weeks                                               | 107 (25.5) | 16 (24.6) | 81 (25.1)  | 10 (31.2) |                  |            |                  |
| More than 2 weeks                                       | 189 (45.1) | 39 (60.0) | 132 (41.0) | 18 (56.3) |                  |            |                  |
| Missing                                                 | 21 (5.0)   | 2 (3.1)   | 19 (5.9)   | 0 (0.00)  |                  |            |                  |
| <i>Phlegm</i>                                           |            |           |            |           |                  |            |                  |
| Yes                                                     | 352 (84.0) | 60 (92.3) | 262 (81.4) | 30 (93.8) | 0.056            | -          | -                |
| No                                                      | 47 (11.2)  | 3 (4.6)   | 42 (13.0)  | 2 (6.2)   |                  |            |                  |
| Missing                                                 | 20 (4.8)   | 2 (3.1)   | 18 (5.6)   | 0 (0.00)  |                  |            |                  |
| <i>Blood</i>                                            |            |           |            |           |                  |            |                  |
| Yes                                                     | 166 (39.6) | 33 (50.8) | 120 (37.3) | 13 (40.6) | 0.068            | -          | -                |
| No                                                      | 233 (55.6) | 30 (46.2) | 184 (57.1) | 19 (59.4) |                  |            |                  |
| Missing                                                 | 20 (4.8)   | 2 (3.0)   | 18 (5.6)   | 0 (0.00)  |                  |            |                  |
| <b>Fever, No (%)</b>                                    |            |           |            |           |                  |            |                  |
| Yes                                                     | 265 (63.3) | 52 (80.0) | 192 (59.6) | 21 (65.6) | <b>0.001</b>     | 85 (46.2)  | <b>&lt;0.001</b> |
| No                                                      | 153 (36.5) | 12 (18.5) | 130 (40.4) | 11 (34.4) |                  | 99 (53.8)  |                  |
| Refused                                                 | 1 (0.2)    | 1 (1.5)   | 0 (0.00)   | 0 (0.00)  |                  | 0 (0)      |                  |
| <b>Night Sweats in the last 3 months, No (%)</b>        |            |           |            |           |                  |            |                  |
| Yes                                                     | 251 (59.9) | 45 (69.2) | 182 (56.5) | 24 (75.0) | 0.072            | 52 (28.3)  | <b>&lt;0.001</b> |
| No                                                      | 168 (40.1) | 20 (30.8) | 140 (43.5) | 8 (25.0)  |                  | 132 (71.7) |                  |
| <b>Weight Loss (unintentional), No (%)</b>              |            |           |            |           |                  |            |                  |
| Yes                                                     | 293 (69.9) | 55 (84.6) | 218 (67.7) | 20 (62.5) | <b>0.004</b>     | 84 (45.6)  | <b>&lt;0.001</b> |
| No                                                      | 123 (29.4) | 9 (13.9)  | 102 (31.7) | 12 (37.5) |                  | 98 (53.3)  |                  |
| Refused                                                 | 3 (0.7)    | 1 (1.5)   | 2 (0.6)    | 0 (0.00)  |                  | 2 (1.1)    |                  |
| <b>Difficulty Breathing, No (%)</b>                     |            |           |            |           |                  |            |                  |
| Yes                                                     | 335 (80.0) | 51 (78.5) | 260 (80.8) | 24 (75.0) | 0.732            | 52 (28.3)  | <b>&lt;0.001</b> |
| No                                                      | 84 (20.0)  | 14 (21.5) | 62 (19.2)  | 8 (25.0)  |                  | 132 (71.7) |                  |

197

198

199

200

201

^ TB was diagnosed based on positive sputum culture i.e., pulmonary TB, we did not include clinical diagnoses or include evaluation for extra-pulmonary TB

\*Screening cohort consists of patients who did not report cough or TB risk factors

202  
203  
204  
205  
206  
207  
208

\*\* Fisher's exact test on binary variables, chi-square test for categorical variables, Wilcoxon rank sum test for continuous variables, and Jonckheere-Terpstra test for ordered categorical variables. The first p value represents a comparison between participants with and without pulmonary TB in the triage cohort and the second p value represents the comparison between the overall triage and screening cohort participant groups. The missing and refused categories are excluded from statistical comparisons.

209 Diagnostic accuracy

210 Using culture as the reference standard for pulmonary TB, qXR v4 (at the manufacturer pre-specified  
211 threshold of 0.5) had an overall sensitivity for pulmonary TB of 0.91 (59/65, 95% CI 0.81-0.97),  
212 specificity of 0.32 (103/322, 95% CI 0.2731-0.37), and AUC of 0.78 (95% CI 0.72-0.84) (Table 2). Using  
213 Xpert as the reference standard for pulmonary TB, qXR v4 (at the manufacturer pre-specified  
214 threshold of 0.5) had an overall sensitivity of 0.93 (64/69, 95% CI 0.84-0.98), specificity of 0.32  
215 (106/329, 95% CI 0.27-0.38), and AUC of 0.76 (95% CI 0.69-0.82) (Table 2). Using a combined  
216 reference standard that was positive if either culture or Xpert was positive, sensitivity and specificity  
217 for qXR v4 were similar (0.93 and 0.33 respectively) (Table S3). When the threshold was set such that  
218 sensitivity was 90% to match the WHO triage test accuracy performance criterion, specificity was 0.44  
219 (142/322, 95% CI 0.39-0.50) and 0.38 (126/329, 95% CI 0.33-0.44) using the culture and Xpert  
220 reference standards respectively (Table 2). Diagnostic accuracy results for qXR v3 are in Table S5.

221  
222 Table 2: Summary of Diagnostic Accuracy for qXR version 4 using the culture (primary) and Xpert  
223 (secondary) reference standards in the triage and screening cohorts.

|                                  | Triage Cohort<br>(n=419)     |                                  |                            | Screening Cohort<br>(n= 184) |                                   |                 |
|----------------------------------|------------------------------|----------------------------------|----------------------------|------------------------------|-----------------------------------|-----------------|
|                                  | Sensitivity<br>(95% CI)      | Specificity<br>(95% CI)          | AUC<br>(95% CI)            | Sensitivity<br>(95% CI)      | Specificity<br>(95% CI)           | AUC<br>(95% CI) |
| <b>Culture</b>                   |                              |                                  |                            |                              |                                   |                 |
| Manufacturer<br>Threshold<br>0.5 | 90.8%<br>59/65<br>(81-96.5%) | 32.0%<br>103/322<br>(26.9-37.4%) | 0.779<br>(0.716,<br>0.843) | ^                            | 93.6%<br>161/172<br>(88.8 -96.4%) | -               |
| Threshold<br>0.7*                | 90.8%<br>59/65               | 44.1%<br>142/322                 | -                          | ^                            | 96.5%<br>(166/172)                | -               |

|                                  | (81-96.5%)                     | (38.6-49.7%)                     |                            |                           | (92.4-98.4%)                     |                    |
|----------------------------------|--------------------------------|----------------------------------|----------------------------|---------------------------|----------------------------------|--------------------|
| <b>Xpert</b>                     |                                |                                  |                            |                           |                                  |                    |
| Manufacturer<br>Threshold<br>0.5 | 92.8%<br>64/69<br>(83.9-97.6%) | 32.2%<br>106/329<br>(27.2-37.6%) | 0.756<br>(0.693,<br>0.819) | 100%<br>1/1<br>(2.5-100%) | 93.9%<br>168/179<br>(89.3-96.9%) | 0.994<br>(-, 1.00) |
| Threshold<br>0.6*                | 89.9%<br>62/69<br>(80.2-95.8%) | 38.3%<br>126/329<br>(33-43.8%)   | -                          | 100%<br>1/1<br>(2.5-100%) | 96.6%<br>173/179<br>(92.8-98.8%) | -                  |

224

225 \*threshold at which sensitivity is closest to 90%

226 ^No positive cultures in the Screening Group

227

228 There was no difference between the AUCs for qXR v4 and qXR v3 using either the culture reference  
 229 standard (0.779 [95% CI 0.72-0.84] versus 0.780 [95% CI 0.72-0.84; p=0.821]) or the Xpert reference  
 230 standard (0.756 [95% CI 0.69-0.82] versus 0.759 [95% CI 0.70-0.82]; p=0.475) (Figure 2).

231

232 Figure 2: Receiver operating characteristic (ROC) curves and estimates of area under the ROC curves  
 233 (AUC) for qXR versions 3 and 4 to identify abnormalities consistent with TB in the triage cohort using  
 234 the culture (left) and Xpert (right) reference standards.

235

### 236 Stratified analyses

237 There was no difference in qXR v4 sensitivity when stratified by sex, age, prior TB, HIV, and symptoms  
 238 (Figure 3). qXR v4 specificity was higher in people without prior TB than in people with prior TB, with  
 239 cough less than 2 weeks compared to cough for more than 2 weeks, and with those who did not  
 240 report weight loss compared to those who reported weight loss (Figure 4). Similarly, qXR v4  
 241 sensitivity appeared to be higher in smear-positive compared to smear-negative disease but did not  
 242 reach statistical significance and numbers of participants with smear negative disease were low.

243

244

245 Figure 3: Sensitivity of qXR version 4 for culture-confirmed pulmonary tuberculosis, overall and in pre-  
246 specified stratified groups. p values are from Fisher's exact tests.

247

248 Figure 4: Specificity of qXR version 4 for culture-confirmed pulmonary tuberculosis, overall and in pre-  
249 specified stratified groups. p values are from Fisher's exact tests.

250

### 251 Sensitivity analyses

252 We examined qXR accuracy when pre-specified groups in whom TB diagnostic tests are often less  
253 sensitive (PWH, people with prior TB and people with other respiratory diseases) were excluded.

254 Sensitivity for qXR v4 was slightly higher in people without HIV (0.93 [95% CI: 0.83-0.98]), slightly  
255 lower in people without prior TB (0.89 [95% CI: 0.77-0.96]), and similar in people without other  
256 respiratory diseases (0.91 [95% CI: 0.81-0.97]). Specificity remained low in people without HIV: 0.31  
257 [95% CI: 0.25-0.36] and people without other respiratory diseases: 0.33 [95% CI: 0.27-0.38], and  
258 slightly higher in people without prior TB: 0.40 [95% CI: 0.34-0.47] (Table S4).

259

### 260 High prevalence of lung abnormalities

261 A high prevalence of radiographic lung abnormalities, most notably opacities (81%), consolidation  
262 (62%), fibrosis (47%), nodules (58%), or cavitation (19%), was detected by qXR on digital CXR images  
263 from the triage cohort (Table S6).

264

### 265 **Screening cohort**

266 Compared to participants in the triage cohort, participants in the screening cohort were more likely  
267 to be younger and female, not have a history of HIV, any respiratory diseases or a prior history of TB,  
268 not have a history of incarceration, more likely to report current alcohol use, and less likely to report  
269 fever, night sweats, or weight loss (Table 1). No participants in the screening cohort had a positive

270 culture, and only one participant had a positive Xpert. Since there was only one person with  
271 confirmed TB in the screening group (who did have a qXR positive result), we only report specificity.  
272 Using the manufacturer's pre-specified thresholds, the specificity for qXR v4 was 0.94 (95% CI 0.89-  
273 0.96) using the culture reference standard and 0.94 (95% CI 0.89-0.97) using the Xpert reference  
274 standard (Table 2).

275

## 276 **Discussion**

277 In our study population of hospitalized patients at a tertiary referral hospital in Lima, Peru, the use of  
278 qXR artificial intelligence software analysis versions 3 and 4 in a triage cohort of patients with cough  
279 or TB risk factors demonstrated a high sensitivity (>90%) but low specificity (~30%), thereby meeting  
280 only the WHO triage test criteria for sensitivity. In our screening cohort of patients without cough or  
281 risk factors, specificity was high (>90%) but sensitivity could not be evaluated since the diagnostic  
282 yield of screening this group in this setting was low (only one patient was diagnosed with Xpert-  
283 positive TB).

284

285 We previously reported that the FAST strategy using Xpert for molecular diagnosis increased the yield  
286 of TB diagnosis and decreased time to treatment initiation(11). Yet, despite WHO guidance that  
287 molecular WHO-recommended rapid TB diagnostic tests (mWRD) such as Xpert should be the initial  
288 test for people being evaluated for TB, implementation in Peru and other high-incidence settings has  
289 lagged(1). While barriers to mWRD implementation are multifactorial(34), cost and limited laboratory  
290 capacity were challenges to the implementation of Xpert as a triage or screening test as part of  
291 routine practice in our setting. The use of a triage tool such as digital CXR with CAD can help identify  
292 which patients should undergo testing with a mWRD(16) as part of transmission prevention strategies

293 such as FAST. In our hospitalized study population, qXR was highly sensitive for correctly triaging  
294 people identified as having cough or TB risk factors who had culture confirmed disease. Although low  
295 qXR specificity would lead to a large number of patients with false positive results who required  
296 confirmatory testing and widespread use of digital CXR with CAD poses implementation challenges,  
297 qXR as a triage tool could be of clinical and public health value due to its impact on diagnostic yield  
298 and may still save enough mWRDs to be cost-effective depending on the setting (cost-effectiveness  
299 analyses from our study are forthcoming). When we adjusted the threshold for qXR v4 to maintain  
300 sensitivity at 90%, specificity rose to 38-44%; thus our data add further weight to the need for  
301 population-specific thresholds(35) to optimize implementation of CAD tools in different settings.

302

303 The low specificity of qXR in inpatients with TB symptoms or risk factors contrasts with cross-  
304 sectional studies that found that qXR met WHO triage test criteria for both sensitivity (>90%) and  
305 specificity (70%) when evaluated in symptomatic outpatients in Bangladesh and Pakistan(24)(36).  
306 Our triage cohort had a high prevalence of radiographic lung abnormalities, which was likely to be an  
307 important contributing factor to the lower than expected specificity in this cohort. Abnormal chest  
308 imaging findings in our study population may be due to inpatient populations in a tertiary referral  
309 hospital being more likely to have acute illnesses such as pneumonia, and may also reflect a higher  
310 proportion of people with chronic lung disease in Lima, a city known to have high rates of air  
311 pollution, which has also been associated with a higher risk of tuberculosis(37). We also note that  
312 this diagnostic accuracy assessment in the triage cohort reflects use of the test in a pre-screened  
313 population who had a high pre-test probability of TB or other lung disease and underwent  
314 microbiological testing that revealed a high prevalence of TB. Thus, negative predictive value would

315 be lower for this cohort than if qXR testing was applied to the population of people initially screened  
316 (rather than those enrolled) for FAST.

317

318 Increasing data demonstrate symptom screening is insensitive(38) and often poorly  
319 implemented(39), and a high proportion of people with TB do not report symptoms(22). The inclusion  
320 of individuals without cough or risk factors in our screening cohort was designed to try to understand  
321 the potential diagnostic yield of using qXR as a screening tool to identify unsuspected TB in  
322 hospitalized patients who may be presenting for various other reasons. In this setting, the diagnostic  
323 yield of screening people without symptoms or risk factors was lower than expected (based on  
324 outpatient studies). The specificity of qXR was high, suggesting it could be a valuable rule-out test in  
325 this setting. The low prevalence of TB in the screening cohort may be an artifact of the sample size or,  
326 it may be because people with TB who present to hospital are more likely to be sicker due to TB and  
327 thus present with cough (resulting in exclusion from the screening cohort) compared to the  
328 outpatient populations in prevalence surveys. The exclusion of people with TB contacts and prior TB  
329 from the screening cohort may have also led to the screening cohort being a lower risk group. The  
330 implementation of strategies such as FAST should consider local epidemiology--including the pre-test  
331 probability of TB in people who do not report symptoms—to determine the optimal approach to  
332 determining who should undergo mWRD testing. Other strategies could also be evaluated to increase  
333 the sensitivity of screening.

334

335 Strengths of our study include generating CAD diagnostic accuracy data from inpatient populations,  
336 including those who were symptomatic and/or high-risk and those without identified cough or TB risk  
337 factors, also contributing to a body of literature seeking to optimize the FAST facility-based



338 transmission prevention strategy in a medium incidence setting. We provide the first head-to-head  
339 evaluation of version 4 (soon to be commercially available) compared to qXR version 3 and  
340 characterize other lung abnormalities detected. We acknowledge the challenges posed by imperfect  
341 reference standards for TB diagnostic accuracy studies(16), although we suspect that paucibacillary  
342 disease (which could cause culture, Xpert, and also CXR to be negative) is less likely in a hospitalized  
343 cohort in a low-HIV prevalence setting. Moreover, the inclusion of reference standard data from  
344 both mycobacterial culture and Xpert is a strength since many diagnostic studies only use Xpert as  
345 the reference standard. Limitations of our study are that digital CXR could only be performed on  
346 inpatients admitted through the emergency room (which may bias the study towards sicker  
347 hospitalized patients) and that with only 65 patients who had culture-confirmed TB, the study only  
348 had sufficient power such that we can report the lower limit of the 95% CI for sensitivity is 0.885 with  
349 95% precision. We note low numbers in certain subgroups, including the number with HIV due to the  
350 low incidence of HIV in Peru and number with smear negative disease, also limit the power to detect  
351 differences in our stratified analyses.

352

353 In conclusion, qXR had high sensitivity but low specificity as a triage tool in the context of use within  
354 the FAST strategy in hospitalized adults admitted to a tertiary referral hospital in Peru who had a high  
355 prevalence of other radiographic lung abnormalities. While specificity was high in patients without  
356 cough or risk factors, the diagnostic yield of screening these patients was low in this setting. These  
357 findings further support the need for population and setting-specific thresholds for CAD programs  
358 and provide additional insights into the role for triage testing in hospitalized patients, which remains  
359 critical to detect and treat individual patients earlier and to curb hospital TB transmission.

360

361 Supporting information captions:  
362  
363 Table S1a: Summary of Culture and Xpert results concordance.  
364 Table S1b: Xpert sensitivity for smear-positive and smear-negative culture-positive TB in triage cohort  
365 patients  
366  
367 Table S2: Demographic and clinical characteristics of enrolled participants compared to those who  
368 were excluded.  
369  
370 Table S3: Diagnostic accuracy of qXR Version 3 and 4 using a reference standard which is positive if  
371 either mycobacterial culture or Xpert is positive for the triage cohort.  
372  
373 Table S4: Diagnostic accuracy of qXR Version 3 and 4 for pre-specified subgroups in the triage cohort  
374 for which participants with prior TB, respiratory diseases, and HIV, were excluded  
375  
376 Table S5: Summary of Diagnostic Accuracy for qXR version 4 compared to the culture (primary) and  
377 Xpert (secondary) reference standards  
378  
379 Table S6: Lung abnormalities detected by qXR analysis for the Triage and Screening cohorts  
380  
381 Figure S1: Sensitivity of qXR version 3 for culture-confirmed pulmonary tuberculosis, overall and in  
382 prespecified stratified groups. p values are from Fisher's exact tests.  
383  
384 Figure S2: Specificity of qXR version 3 for culture-confirmed pulmonary tuberculosis, overall and in  
385 prespecified stratified groups. p values are from Fisher's exact tests.

## **Acknowledgements**

The authors were allowed to use the qXR algorithms free of charge from qure.ai for research purposes, but the companies had no influence over the research question, nor any other aspect of the work carried out, and had no impact on the transparency of the article.

## **Funding**

This work was funded by the National Institutes of Health (NIAID R01 AI112748, PIs: Nardell and Tierney, and NIAID K23 AI132648-05, PI: Nathavitharana). RRN also acknowledges support from an American Society of Tropical Medicine and Hygiene Burroughs Wellcome Fellowship.

The funders had no role in study design, data collection, data analysis, data interpretation, writing of the report, or in the decision to submit for publication. The content is solely the responsibility of the authors and does not necessarily represent the views of the funders.

## **Competing interests**

The authors declare that no competing interests exist.

## **Data Availability Statement**

All relevant data are uploaded to the Harvard Dataverse repository.

## References

1. World Health Organization. Global tuberculosis report 2022 [Internet]. Geneva: World Health Organization; 2022 [cited 2022 Dec 5]. Available from: <https://apps.who.int/iris/handle/10665/363752>
2. Subbaraman R, Jhaveri T, Nathavitharana RR. Closing gaps in the tuberculosis care cascade: an action-oriented research agenda. *J Clin Tuberc Other Mycobact Dis*. 2020/02/20 ed. 2020 May;19:100144.
3. Willingham FF, Schmitz TL, Contreras M, Kalangi SE, Vivar AM, Caviedes L, et al. Hospital control and multidrug-resistant pulmonary tuberculosis in female patients, Lima, Peru. *Emerg Infect Dis*. 2001/03/27 ed. 2001 Jan;7(1):123–7.
4. Assefa D, Belachew F, Wondimagegn G, Klinkenberg E. Missed pulmonary tuberculosis: a cross sectional study in the general medical inpatient wards of a large referral hospital in Ethiopia. *BMC Infect Dis*. 2019/01/19 ed. 2019 Jan 17;19(1):60.
5. Gandhi NR, Weissman D, Moodley P, Ramathal M, Elson I, Kreiswirth BN, et al. Nosocomial transmission of extensively drug-resistant tuberculosis in a rural hospital in South Africa. *J Infect Dis*. 2012/11/21 ed. 2013 Jan 1;207(1):9–17.
6. Migliori GB, Nardell E, Yedilbayev A, D'Ambrosio L, Centis R, Tadolini M, et al. Reducing tuberculosis transmission: a consensus document from the World Health Organization Regional Office for Europe. *Eur Respir J* [Internet]. 2019/04/27 ed. 2019 Jun;53(6). Available from: <https://www.ncbi.nlm.nih.gov/pubmed/31023852>
7. Nardell EA. Transmission and Institutional Infection Control of Tuberculosis. *Cold Spring Harb Perspect Med*. 2015/08/22 ed. 2015 Aug 20;6(2):a018192.
8. World Health Organization. Rapid communication: key changes to the treatment of drug-resistant tuberculosis [Internet]. Geneva: World Health Organization; 2022 [cited 2022 Jun 6] p. 6. Available from: <https://apps.who.int/iris/handle/10665/353743>
9. Paleckyte A, Dissanayake O, Mpagama S, Lipman MC, McHugh TD. Reducing the risk of tuberculosis transmission for HCWs in high incidence settings. *Antimicrob Resist Infect Control*. 2021/07/21 ed. 2021 Jul 19;10(1):106.
10. Barrera E, Livchits V, Nardell E. F-A-S-T: a refocused, intensified, administrative tuberculosis transmission control strategy. *Int J Tuberc Lung Dis*. 2015/04/11 ed. 2015 Apr;19(4):381–4.
11. Tierney DB, Orvis E, Nathavitharana RR, Hurwitz S, Tintaya K, Vargas D, et al. FAST tuberculosis transmission control strategy speeds the start of tuberculosis treatment at a general hospital in Lima, Peru. *Infect Control Hosp Epidemiol*. 2021 Oct 6;1–7.

12. Nathavitharana RR, Daru P, Barrera AE, Mostofa Kamal SM, Islam S, Ul-Alam M, et al. FAST implementation in Bangladesh: high frequency of unsuspected tuberculosis justifies challenges of scale-up. *Int J Tuberc Lung Dis*. 2017/08/23 ed. 2017 Sep 1;21(9):1020–5.
13. Miller AC, Livchits V, Ahmad Khan F, Atwood S, Kornienko S, Kononenko Y, et al. Turning Off the Tap: Using the FAST Approach to Stop the Spread of Drug-Resistant Tuberculosis in the Russian Federation. *The Journal of Infectious Diseases*. 2018 Jul 13;218(4):654–8.
14. Le H, Nguyen N, Tran P, Hoa N, Hung N, Moran A, et al. Process measure of FAST tuberculosis infection control demonstrates delay in likely effective treatment. *Int J Tuberc Lung Dis*. 2019/01/10 ed. 2019 Feb 1;23(2):140–6.
15. WHO. WHO Consolidated guidelines on tuberculosis, Module 2: Screening, Systematic screening for tuberculosis disease [Internet]. WHO; 2021. Available from: <https://reliefweb.int/report/world/who-consolidated-guidelines-tuberculosis-module-2-screening-systematic-screening>
16. Nathavitharana RR, Yoon C, Macpherson P, Dowdy DW, Cattamanchi A, Somoskovi A, et al. Guidance for Studies Evaluating the Accuracy of Tuberculosis Triage Tests. *The Journal of Infectious Diseases*. 2019 Oct 8;220(Supplement\_3):S116–25.
17. WHO. CHEST RADIOGRAPHY IN TUBERCULOSIS DETECTION [Internet]. WHO; 2016. Available from: <https://apps.who.int/iris/bitstream/handle/10665/252424/9789241511506-eng.pdf>
18. Kik SV, Gelaw SM, Ruhwald M, Song R, Khan FA, van Hest R, et al. Diagnostic accuracy of chest X-ray interpretation for tuberculosis by three artificial intelligence-based software in a screening use-case: an individual patient meta-analysis of global data [Internet]. *Infectious Diseases (except HIV/AIDS)*; 2022 Jan [cited 2022 Dec 5]. Available from: <http://medrxiv.org/lookup/doi/10.1101/2022.01.24.22269730>
19. Gelaw SM, Kik SV, Ruhwald M, Ongarello S, Egzertegegne TS, Gorbacheva O, et al. Diagnostic accuracy of three computer-aided detection systems for detecting pulmonary tuberculosis on chest radiography when used for screening: analysis of an international, multicenter migrants screening study [Internet]. *Radiology and Imaging*; 2022 Apr [cited 2022 Dec 5]. Available from: <http://medrxiv.org/lookup/doi/10.1101/2022.03.30.22273191>
20. Tavaziva G, Harris M, Abidi SK, Geric C, Breuninger M, Dheda K, et al. Chest X-ray Analysis With Deep Learning-Based Software as a Triage Test for Pulmonary Tuberculosis: An Individual Patient Data Meta-Analysis of Diagnostic Accuracy. *Clinical Infectious Diseases*. 2021 Jul 21;ciab639.
21. Nash M, Kadavigere R, Andrade J, Sukumar CA, Chawla K, Shenoy VP, et al. Deep learning, computer-aided radiography reading for tuberculosis: a diagnostic accuracy study from a tertiary hospital in India. *Sci Rep*. 2020 Dec;10(1):210.
22. Frascella B, Richards AS, Sossen B, Emery JC, Odone A, Law I, et al. Subclinical Tuberculosis Disease—A Review and Analysis of Prevalence Surveys to Inform Definitions, Burden, Associations, and Screening Methodology. *Clinical Infectious Diseases*. 2021 Aug 2;73(3):e830–41.

23. Divala TH, Lewis J, Bulterys MA, Lutje V, Corbett EL, Schumacher SG, et al. Missed opportunities for diagnosis and treatment in patients with TB symptoms: a systematic review. *public health action*. 2022 Mar 21;12(1):10–7.
24. Qin ZZ, Ahmed S, Sarker MS, Paul K, Adel ASS, Naheyan T, et al. Tuberculosis detection from chest x-rays for triaging in a high tuberculosis-burden setting: an evaluation of five artificial intelligence algorithms. *The Lancet Digital Health*. 2021 Sep;3(9):e543–54.
25. Muyoyeta M, Maduskar P, Moyo M, Kasese N, Milimo D, Spooner R, et al. The Sensitivity and Specificity of Using a Computer Aided Diagnosis Program for Automatically Scoring Chest X-Rays of Presumptive TB Patients Compared with Xpert MTB/RIF in Lusaka Zambia. Wilkinson RJ, editor. *PLoS ONE*. 2014 Apr 4;9(4):e93757.
26. Breuninger M, van Ginneken B, Philipsen RHHM, Mhimbira F, Hella JJ, Lwilla F, et al. Diagnostic Accuracy of Computer-Aided Detection of Pulmonary Tuberculosis in Chest Radiographs: A Validation Study from Sub-Saharan Africa. Hoshino Y, editor. *PLoS ONE*. 2014 Sep 5;9(9):e106381.
27. Melendez J, Sánchez CI, Philipsen RHHM, Maduskar P, Dawson R, Theron G, et al. An automated tuberculosis screening strategy combining X-ray-based computer-aided detection and clinical information. *Sci Rep*. 2016 Jul;6(1):25265.
28. Yuen CM, Puma D, Millones AK, Galea JT, Tzelios C, Calderon RI, et al. Identifying barriers and facilitators to implementation of community-based tuberculosis active case finding with mobile X-ray units in Lima, Peru: a RE-AIM evaluation. *BMJ Open*. 2021 Jul;11(7):e050314.
29. Nguyen LH, Codlin AJ, Vo LNQ, Dao T, Tran D, Forse RJ, et al. An Evaluation of Programmatic Community-Based Chest X-ray Screening for Tuberculosis in Ho Chi Minh City, Vietnam. *TropicalMed*. 2020 Dec 10;5(4):185.
30. Madhani F, Maniar RA, Burfat A, Ahmed M, Farooq S, Sabir A, et al. Automated chest radiography and mass systematic screening for tuberculosis. *int j tuberc lung dis*. 2020 Jul 1;24(7):665–73.
31. Mungai B, Ong'angò J, Ku CC, Henrion MYR, Morton B, Joekes E, et al. Accuracy of computer-aided chest X-ray in community-based tuberculosis screening: Lessons from the 2016 Kenya National Tuberculosis Prevalence Survey. Majumdar S, editor. *PLOS Glob Public Health*. 2022 Nov 23;2(11):e0001272.
32. Bossuyt PM, Reitsma JB, Bruns DE, Gatsonis CA, Glasziou PP, Irwig L, et al. STARD 2015: an updated list of essential items for reporting diagnostic accuracy studies. *BMJ*. 2015 Oct 28;h5527.
33. World Health Organization. High-priority target product profiles for new tuberculosis diagnostics: report of a consensus meeting. Geneva, Switzerland; 2014 Apr.
34. Albert H, Nathavitharana RR, Isaacs C, Pai M, Denkinger CM, Boehme CC. Development, roll-out and impact of Xpert MTB/RIF for tuberculosis: what lessons have we learnt and how can we do better? *Eur Respir J*. 2016 Aug;48(2):516–25.

35. Qin ZZ, Sander MS, Rai B, Titahong CN, Sudrungrot S, Laah SN, et al. Using artificial intelligence to read chest radiographs for tuberculosis detection: A multi-site evaluation of the diagnostic accuracy of three deep learning systems. *Sci Rep*. 2019 Dec;9(1):15000.
36. Khan FA, Majidulla A, Tavaziva G, Nazish A, Abidi SK, Benedetti A, et al. Chest x-ray analysis with deep learning-based software as a triage test for pulmonary tuberculosis: a prospective study of diagnostic accuracy for culture-confirmed disease. *The Lancet Digital Health*. 2020 Nov;2(11):e573–81.
37. Lin YJ, Lin HC, Yang YF, Chen CY, Ling MP, Chen SC, et al. Association Between Ambient Air Pollution and Elevated Risk of Tuberculosis Development. *IDR*. 2019 Dec;Volume 12:3835–47.
38. Yoon C, Dowdy DW, Esmail H, MacPherson P, Schumacher SG. Screening for tuberculosis: time to move beyond symptoms. *The Lancet Respiratory Medicine*. 2019 Mar;7(3):202–4.
39. Divala TH, Lewis J, Bulterys MA, Lutje V, Corbett EL, Schumacher SG. Missed opportunities for diagnosis and treatment in patients with TB symptoms: a systematic review. *Public Health Action*. :8.

Figure 1: Study Flow Diagram

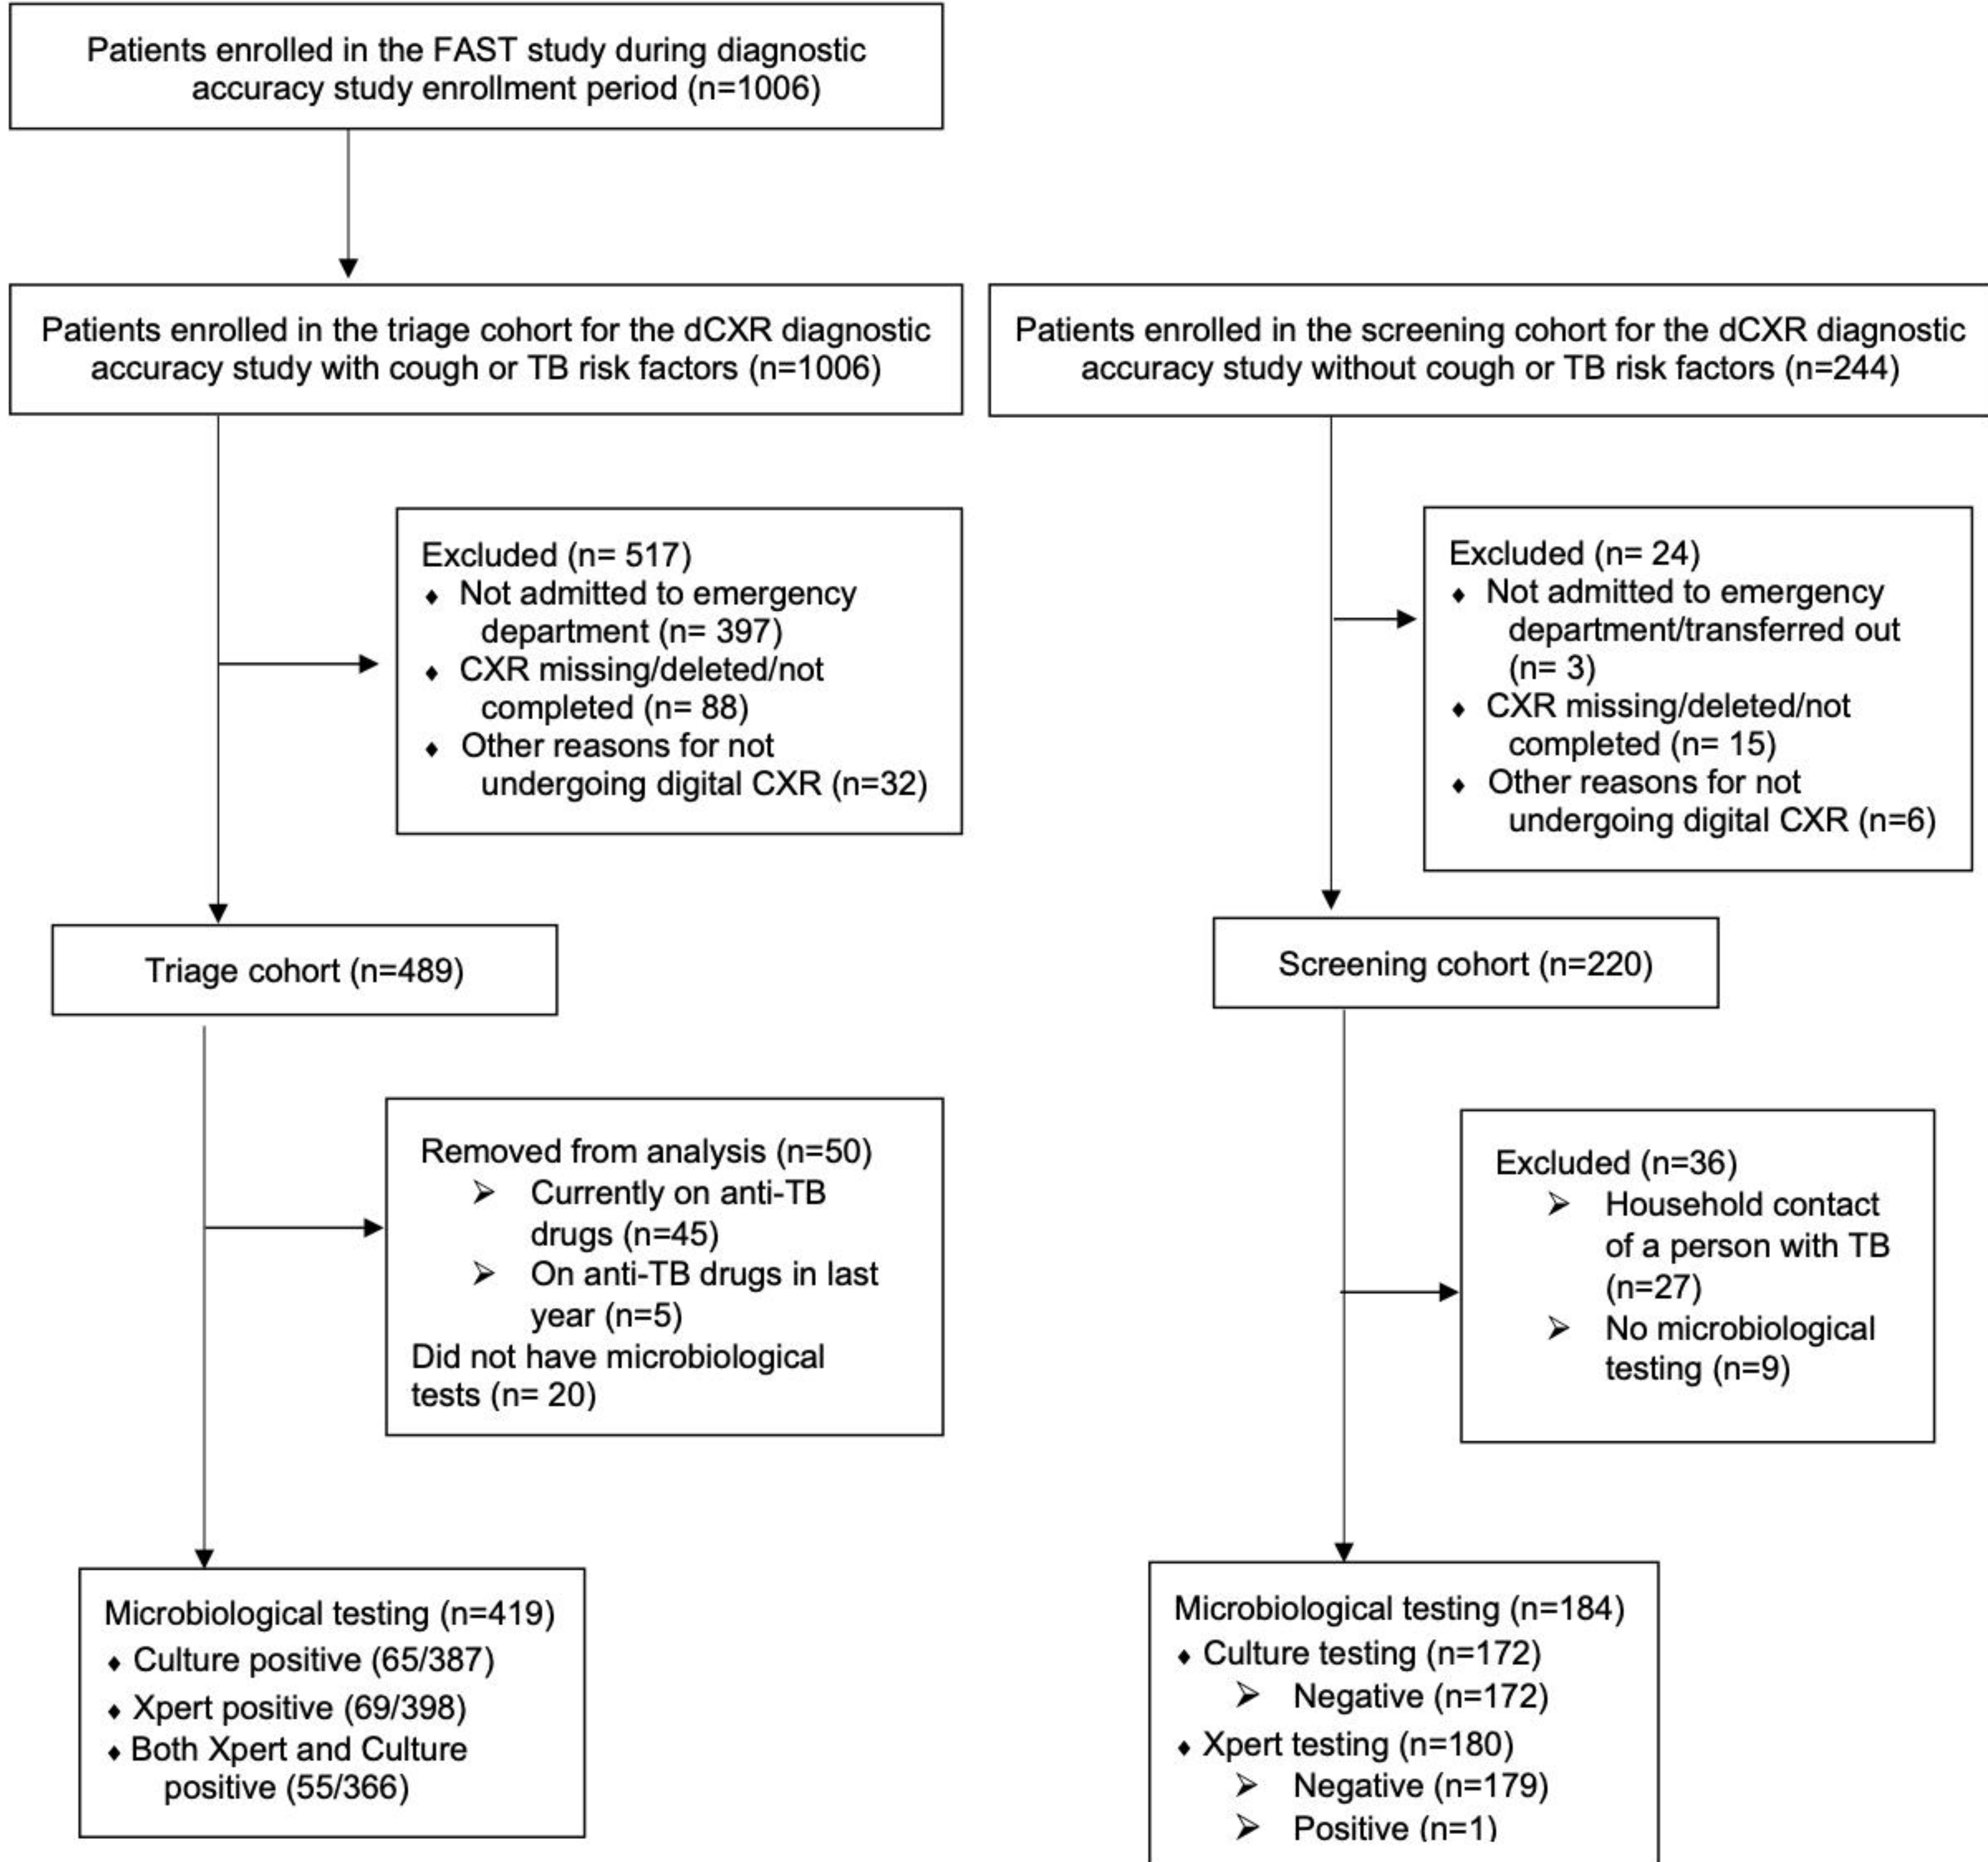



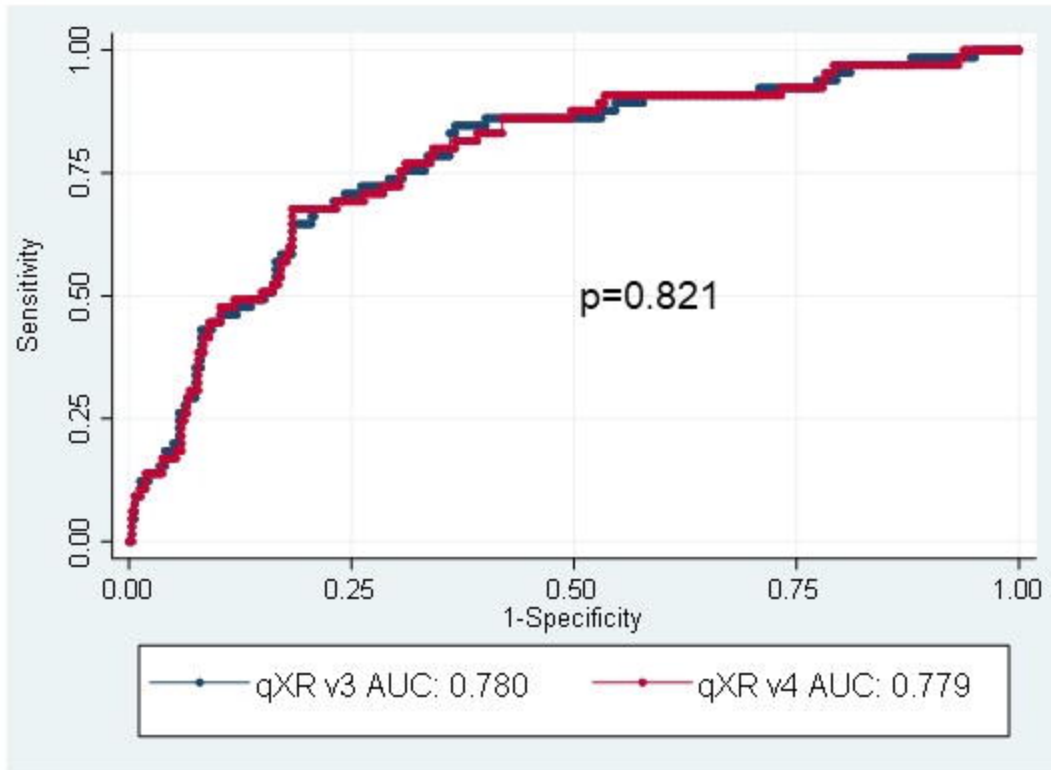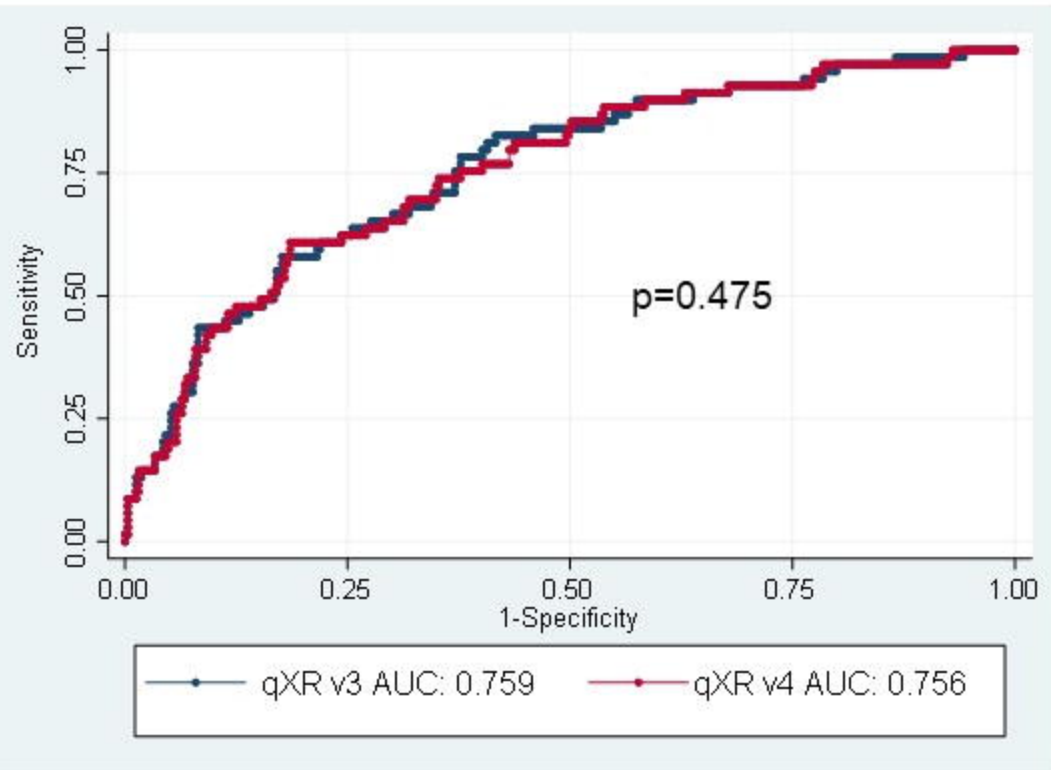

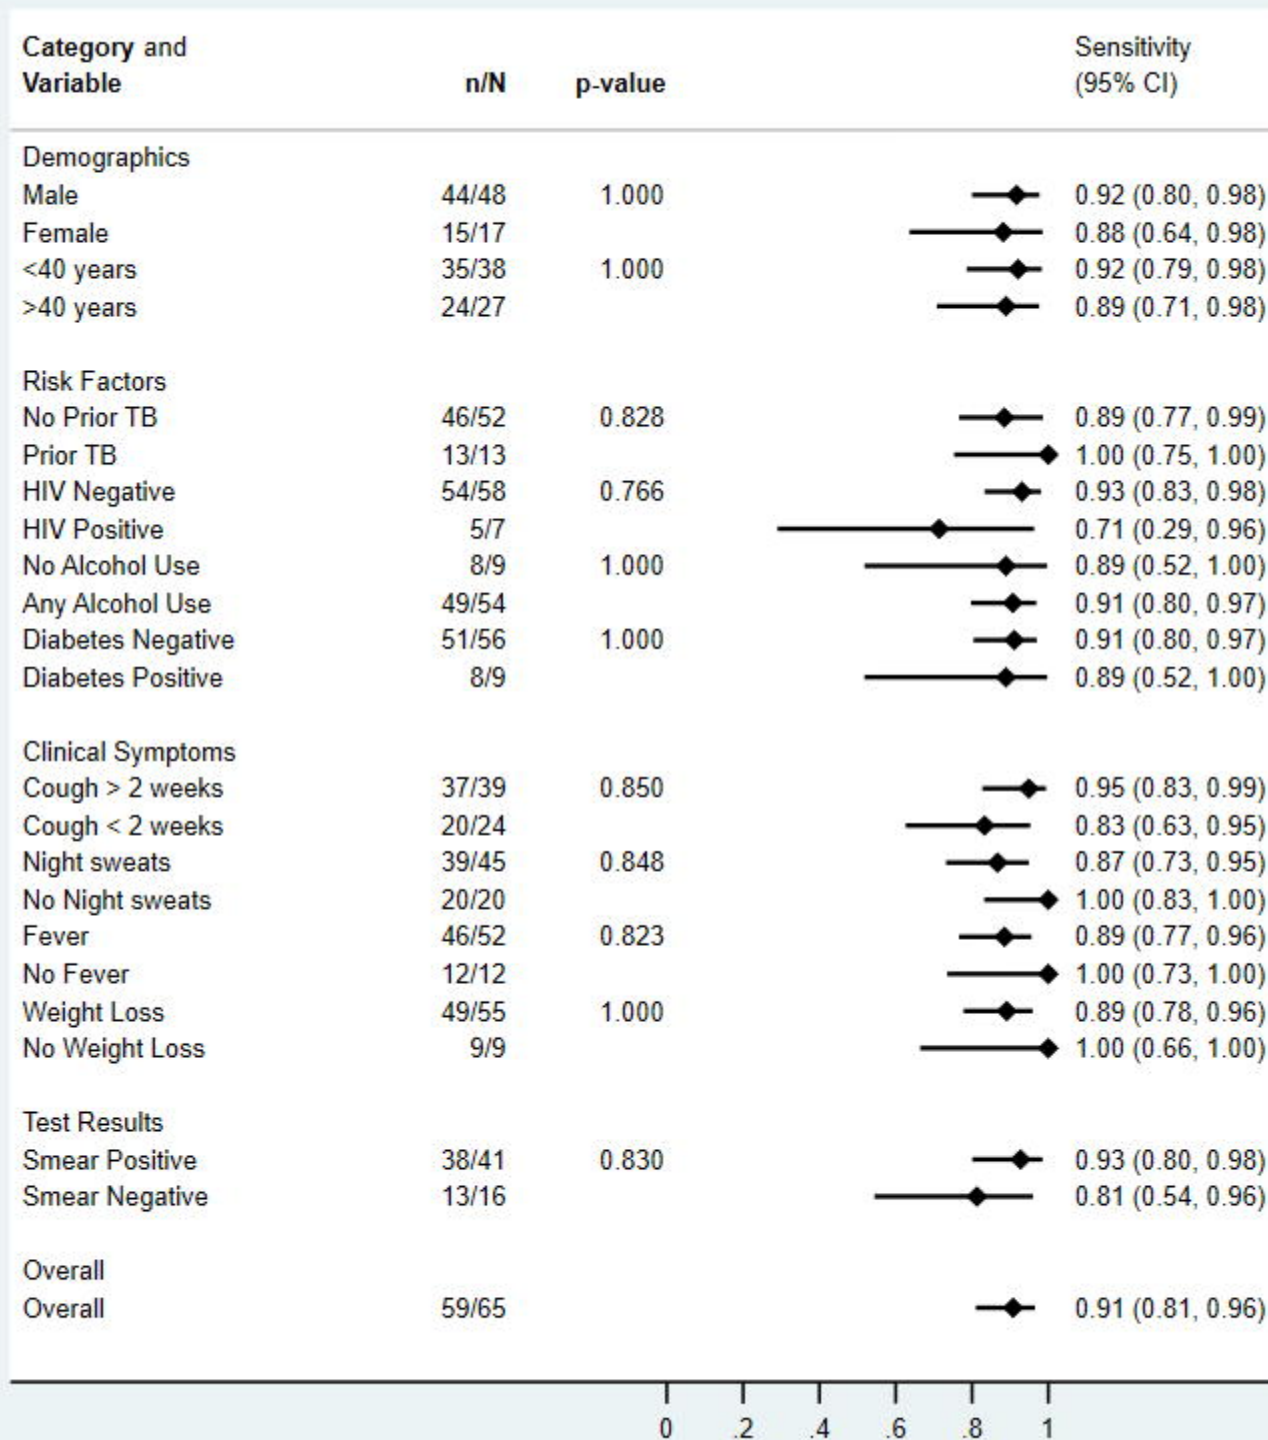

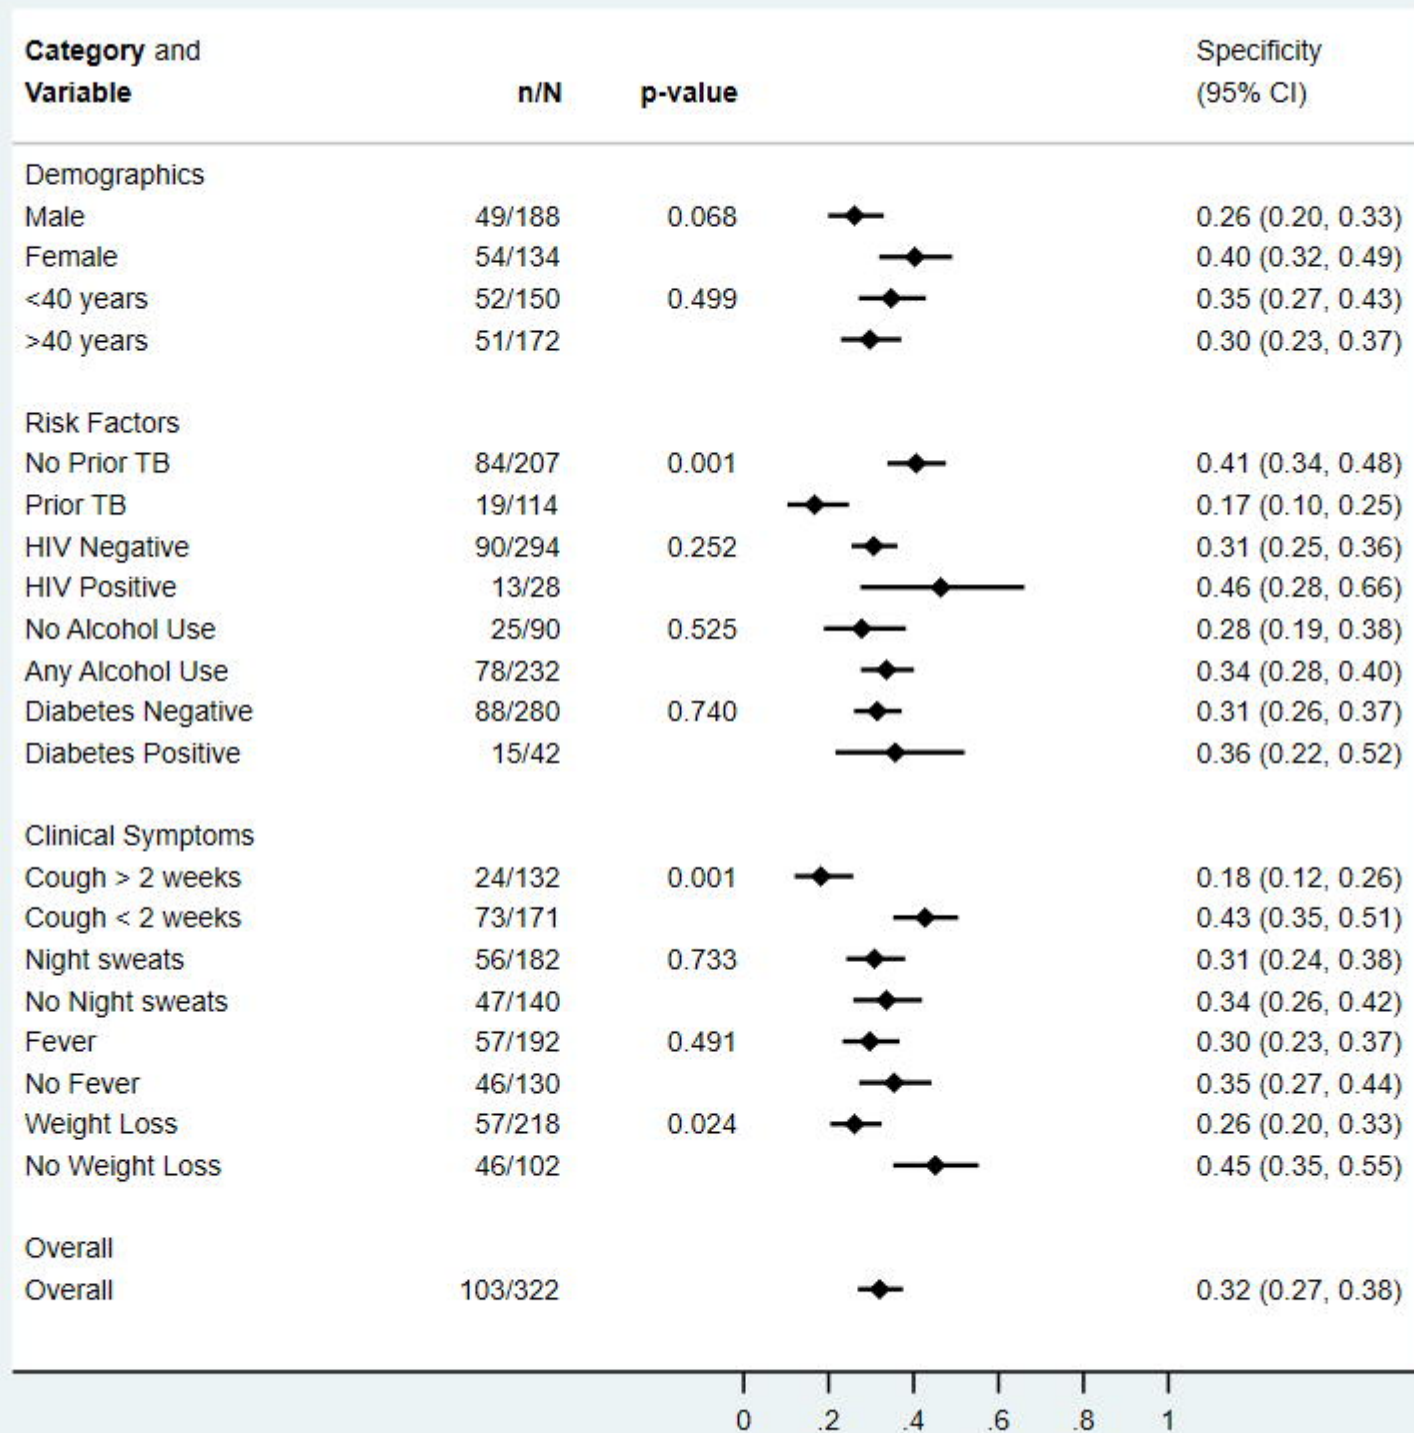

Source: https://www.medrxiv.org/content/10.1101/2023.05.17.23290110v2.full.pdf
